# Supplementary material for: Rhodamine 6G-based efficient chemosensor for trivalent metal ions (Al3+, Cr3+ and Fe3+) upon single excitation with applications in combinational logic circuits and memory devices
Source: Royal Society of Chemistry journal article supplement (doi:10.1039/d1an01788h), 2021-12-10
Supplement: d1an01788h1.pdf [file d1an01788h1.pdf]

Supporting Information for

## Rhodamine 6G based efficient chemosensor for the trivalent metal ions ( $\text{Al}^{3+}$ , $\text{Cr}^{3+}$ and $\text{Fe}^{3+}$ ) upon single excitation with applications in combinational logic circuits and memory devices

Dipankar Das<sup>a</sup>, Rabiul Alam<sup>a</sup> and Mahammad Ali<sup>a,\*</sup>

<sup>a</sup>Department of Chemistry, Jadavpur University, Kolkata 700 032, India, Fax: 91-33-2414-6223, E-mail: [m\\_ali2062@yahoo.com](mailto:m_ali2062@yahoo.com),

|                                                                                                                                                              |                             |
|--------------------------------------------------------------------------------------------------------------------------------------------------------------|-----------------------------|
| 1. $^1\text{H}$ NMR spectrum of $\text{L}^3$                                                                                                                 | Fig.S1.                     |
| 2. $^1\text{H}$ NMR spectrum of $[\text{L}^3+\text{Al}]^{3+}$ complex.                                                                                       | Fig. S1a.                   |
| 3. $^{13}\text{C}$ -NMR of $\text{L}^3$                                                                                                                      | Fig. S2.                    |
| 4. Mass spectrum of $\text{L}^2$ in MeCN                                                                                                                     | Fig. S3.                    |
| 5. Mass spectrum of $\text{L}^3$ in MeCN                                                                                                                     | Fig. S3a                    |
| 6. Mass spectrum of $[\text{L}^3+\text{Fe}^{3+}]$ complex in MeCN.                                                                                           | Fig. S3b.                   |
| 7. Mass spectrum of $[\text{L}^3+\text{Al}^{3+}]$ complex in MeCN.                                                                                           | Fig. S3c.                   |
| 8. Mass spectrum of $[\text{L}^3+\text{Cr}^{3+}]$ complex in MeCN.                                                                                           | Fig. S3d.                   |
| 9. FT-IR spectrum of $\text{L}^3$ in KBr pellet.                                                                                                             | Fig. S4.                    |
| 10. FT-IR spectrum of $[\text{L}^3+\text{Al}]^{3+}$ complex in KBr pellet                                                                                    | Fig. S4a.                   |
| 11. FT-IR spectrum of $[\text{L}^3+\text{Cr}]^{3+}$ complex in KBr pellet                                                                                    | Fig. S4b                    |
| 12. IR spectra of ( $\text{L}^3$ ), $[\text{L}^3-\text{Al}^{3+}]$ and $[\text{L}^3-\text{Cr}^{3+}]$ complexes in MeCN                                        | Fig.S4c                     |
| 13. UV-Vis titration of $\text{L}^3$ with $\text{Al}^{3+}$ in $\text{H}_2\text{O}/\text{CH}_3\text{CN}$ (7:3,v/v) in HEPES buffer pH 7.2                     | Fig. S5                     |
| 14. UV-Vis titration of $\text{L}^3$ with $\text{Cr}^{3+}$ in $\text{H}_2\text{O}/\text{CH}_3\text{CN}$ (7:3,v/v) in HEPES buffer pH 7.2                     | Fig. S5a                    |
| 15. Fluorometric titration of $\text{L}^3$ with $\text{Al}^{3+}$ in $\text{H}_2\text{O}/\text{CH}_3\text{CN}$ (7:3,v/v) in HEPES buffer pH 7.2               | Fig. S6                     |
| 16. Fluorometric titration of $\text{L}^3$ with $\text{Cr}^{3+}$ in $\text{H}_2\text{O}/\text{CH}_3\text{CN}$ (4:1,v/v) in HEPES buffer pH 7.2               | Fig.S6a                     |
| 17. Non-linear fitting of fluorescence titration curves for $\text{Fe}^{3+}$ , $\text{Al}^{3+}$ and $\text{Cr}^{3+}$ with $K_d$ values                       | Fig.S6b                     |
| 18. Determination of S.D. of $\text{L}^3$ and LOD's for $\text{Fe}^{3+}$ , $\text{Al}^{3+}$ and $\text{Cr}^{3+}$                                             | Fig. S7, S8, S8a and S8b    |
| 19. Jobs plot.                                                                                                                                               | Fig.S9, Fig.S9a and Fig.S9b |
| 20. Fluorometric titration of $[\text{L}^3+\text{Fe}]^{3+}$ with $\text{CN}^-$ in $\text{H}_2\text{O}/\text{CH}_3\text{CN}$ (7:3,v/v) in HEPES buffer pH 7.2 | Fig. S10                    |

|                                                                                                                                                                                                             |                    |
|-------------------------------------------------------------------------------------------------------------------------------------------------------------------------------------------------------------|--------------------|
| 21. Fluorometric titration of $[\text{L}^3+\text{Al}]^{3+}$ with $\text{CN}^-$ in $\text{H}_2\text{O} / \text{CH}_3\text{CN}$ (7:3,v/v) in HEPES buffer pH 7.2                                              | Fig.S10a           |
| 22. Fluorometric titration of $[\text{L}^3+\text{Cr}]^{3+}$ with $\text{CN}^-$ in $\text{H}_2\text{O} / \text{CH}_3\text{CN}$ (7:3,v/v) in HEPES buffer pH 7.2.                                             | Fig. S10b          |
| 23. Fluorescence experiment to show the reversibility and reusability of the receptor for sensing $\text{Fe}^{3+}$ by alternate addition of $\text{CN}^-$                                                   | Fig.S10c           |
| 24. pH dependence of fluorescence responses of $\text{L}^3$ and its $[\text{L}^3-\text{Fe}^{3+}]$ complex                                                                                                   | Fig.S11            |
| 25. pH study for $\text{Al}^{3+}$ and $\text{Cr}^{3+}$ complexes with $\text{L}^3$                                                                                                                          | Fig. S11a and S11b |
| 26. Four-input OR-INHIBIT logic gate representation of the emission of $\text{L}^3$ with different input when monitoring the emission at 558 nm.                                                            | Fig. S12           |
| 27. Fluorescence response of the probe $\text{L}^3$ in presence of Au(III), Dy(III), Ga(III), Y(III), Sm(III), Ru(III) and Co(III) with respect to $\text{Fe}^{3+}$ , $\text{Al}^{3+}$ and $\text{Cr}^{3+}$ | Fig. S13           |
| 28. Some previously representative trivalent sensors.                                                                                                                                                       | Fig. S14           |
| 29. Real water sample test with the probe                                                                                                                                                                   | Fig. S15           |
| 30. Some previously reported rhodamine based trivalent sensors.                                                                                                                                             | Fig. S16           |
| 31. Mechanism of spirolactum ring opening in the presence of $\text{M}^{3+}$ (M=Fe, Cr, Al).                                                                                                                | Scheme S1          |
| 32. A list of trivalent sensors along with some important parameters                                                                                                                                        | Table S1           |
| 33. A list rhodamine based trivalent sensors along with some important parameters                                                                                                                           | <b>Table S2</b>    |
| 34. Determination of $\text{Fe}^{3+}$ concentrations in real water samples.                                                                                                                                 | <b>Table S3</b>    |

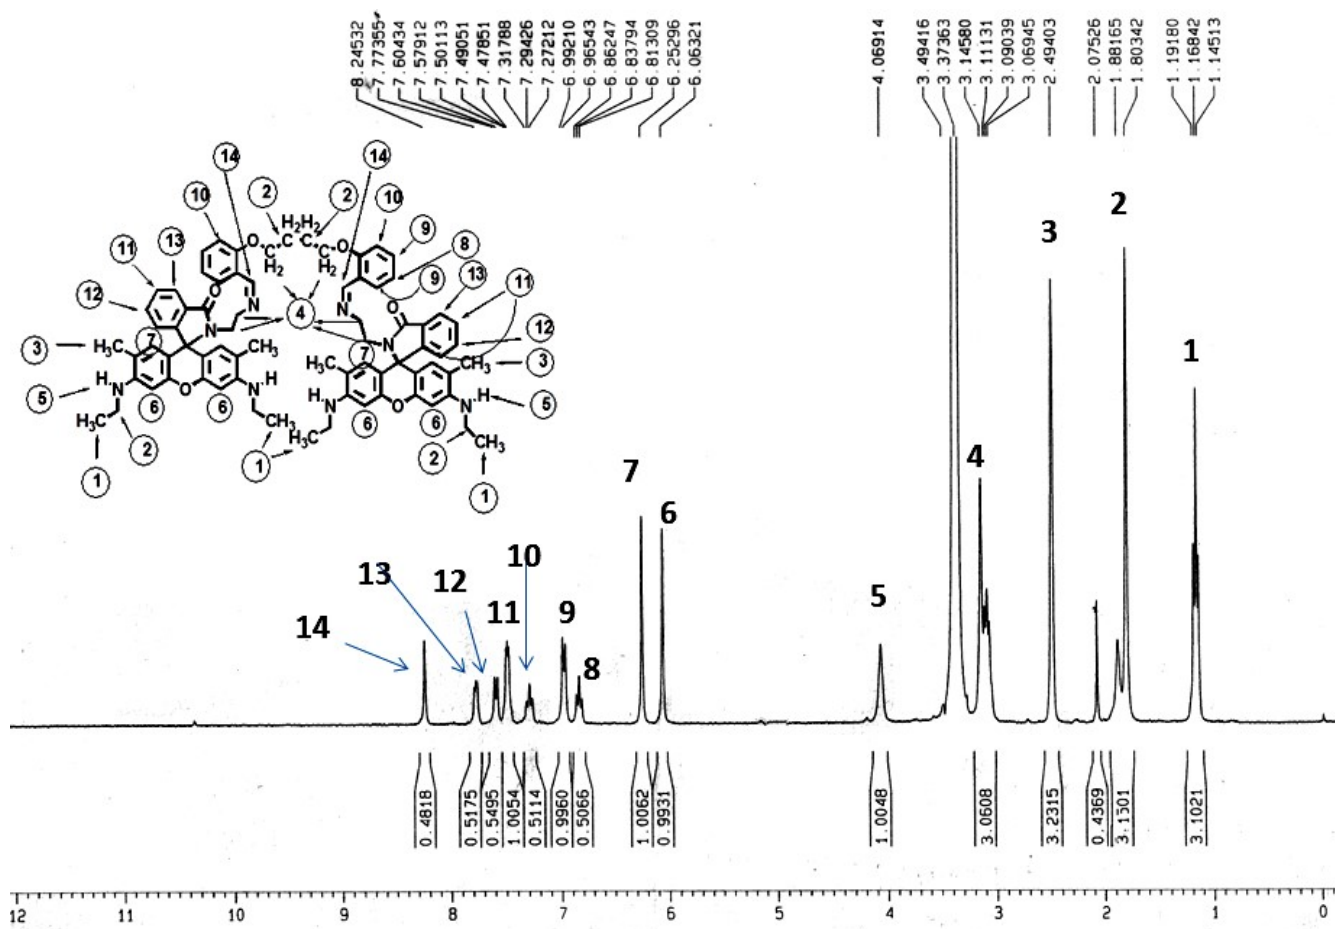

Fig. S1.  $^1H$  NMR spectrum of  $L^3$  in  $DMSO-d_6$ , in Bruker 300 MHz instrument.

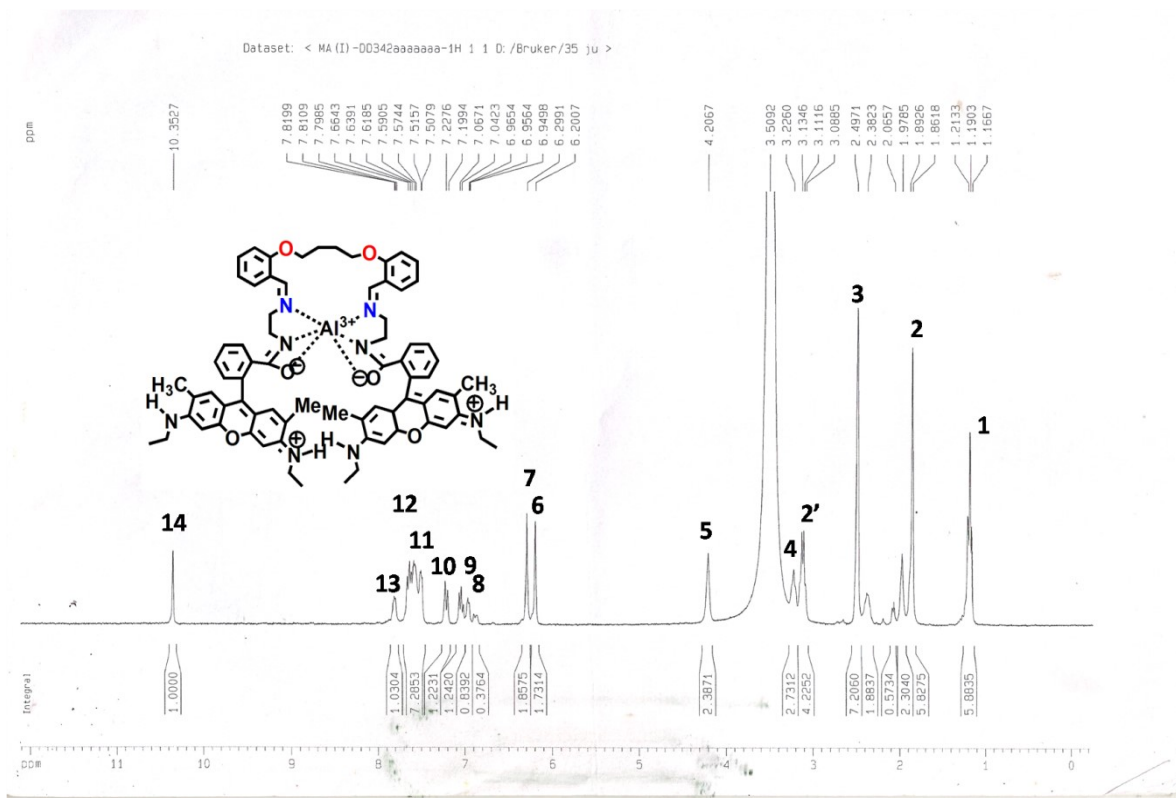

**Fig. S1a.**  $^1\text{H}$  NMR spectrum of  $[\text{L}^3\text{-Al}^{3+}]$  complex in  $\text{DMSO-d}_6$ , in Bruker 300 MHz instrument.

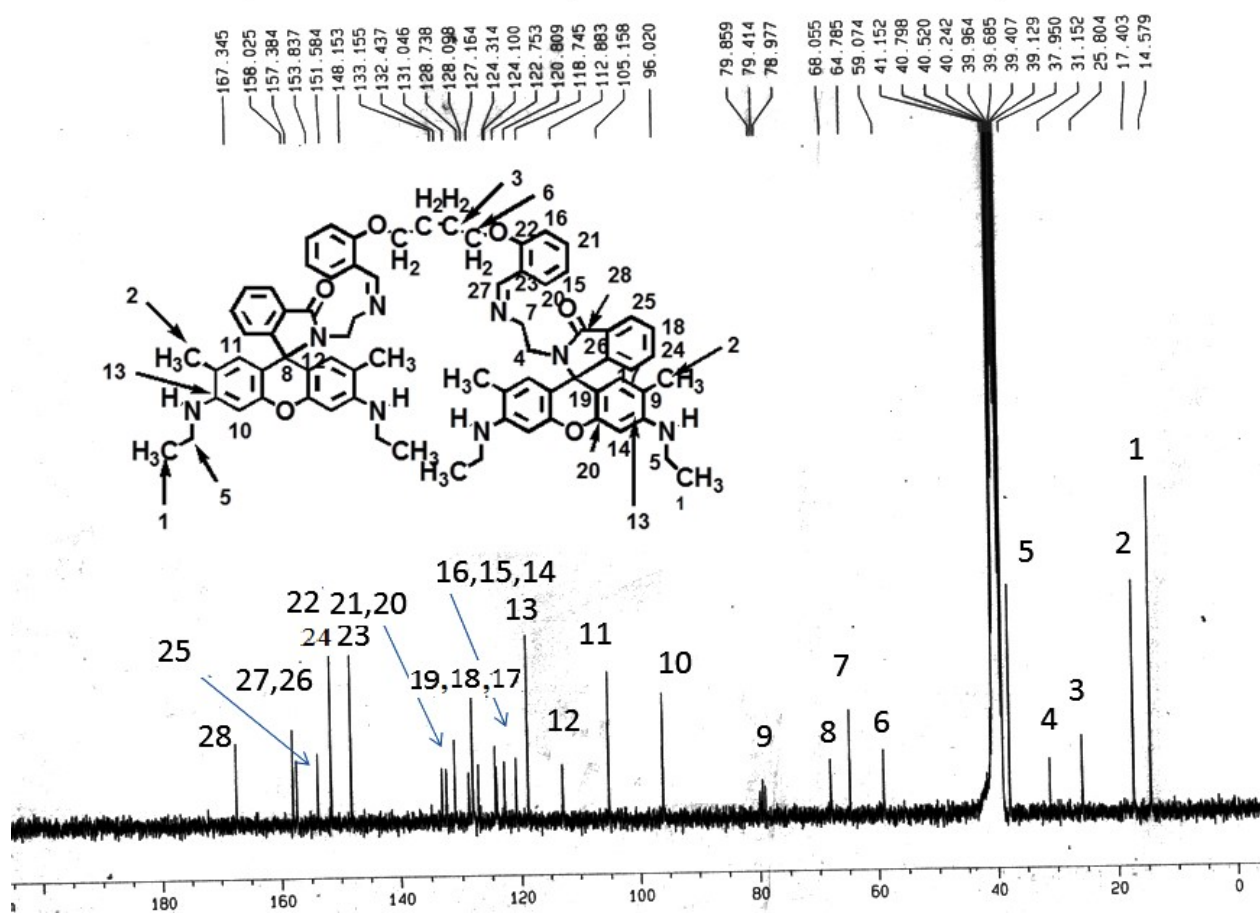

Fig. S2.  $^{13}\text{C}$  NMR spectrum of  $\text{L}^3$  in  $\text{DMSO-d}_6$ , in Bruker 300 MHz instrument.

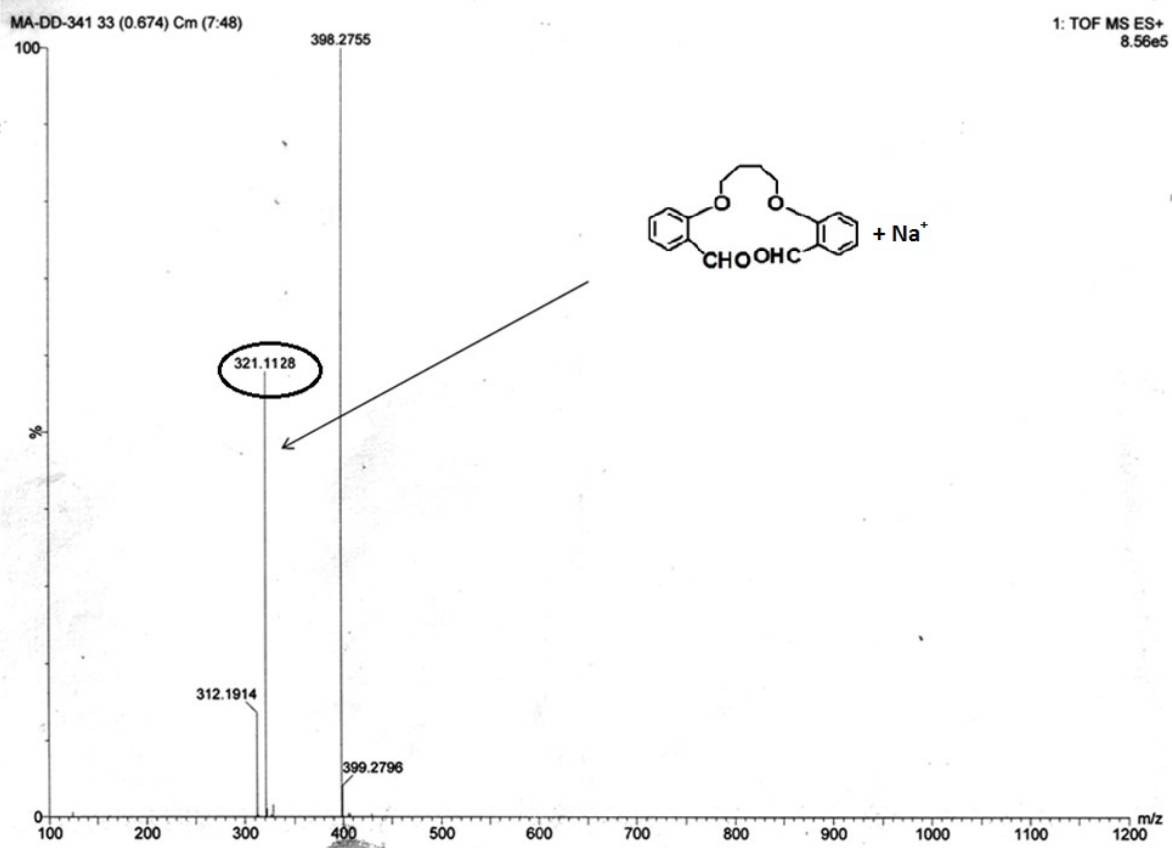

Fig.S3. Mass spectroscopy of L<sup>2</sup> in MeCN.

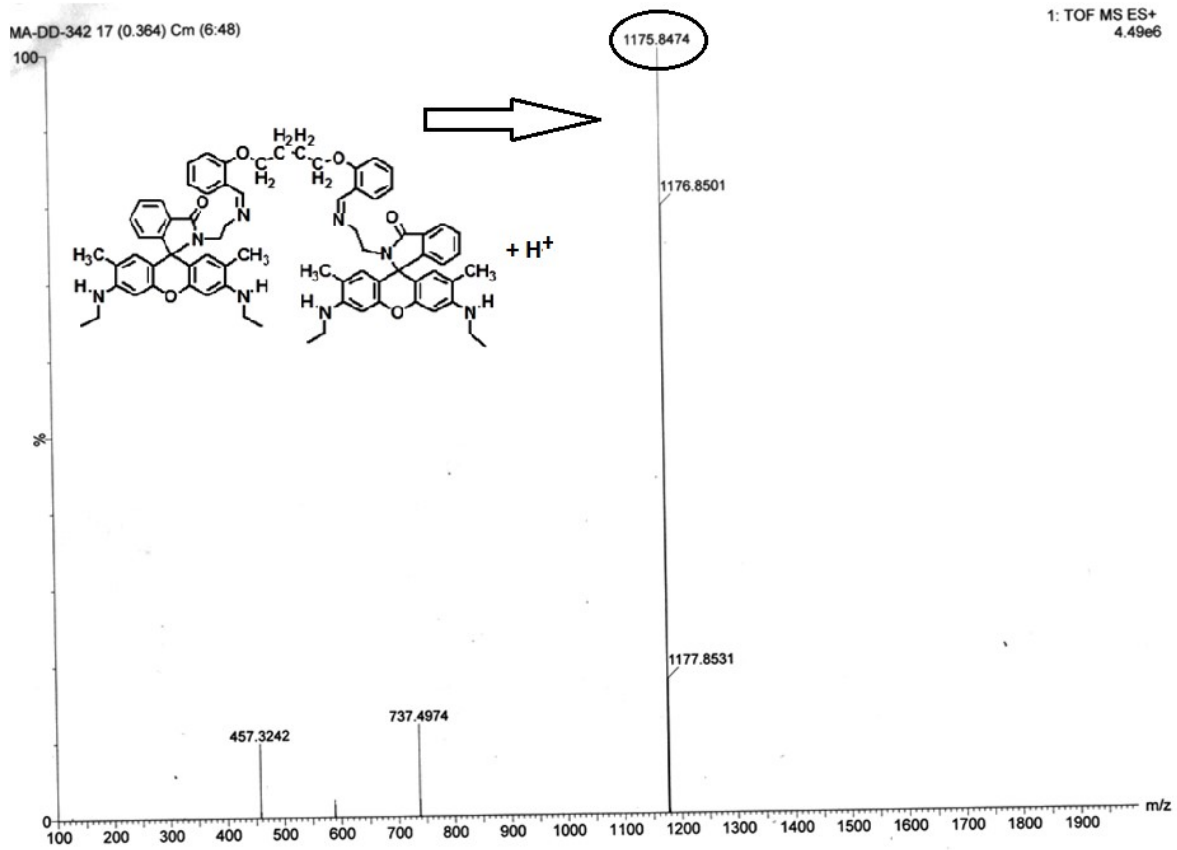

**Fig. S3a.** Mass spectroscopy of  $L^3$  in MeCN.

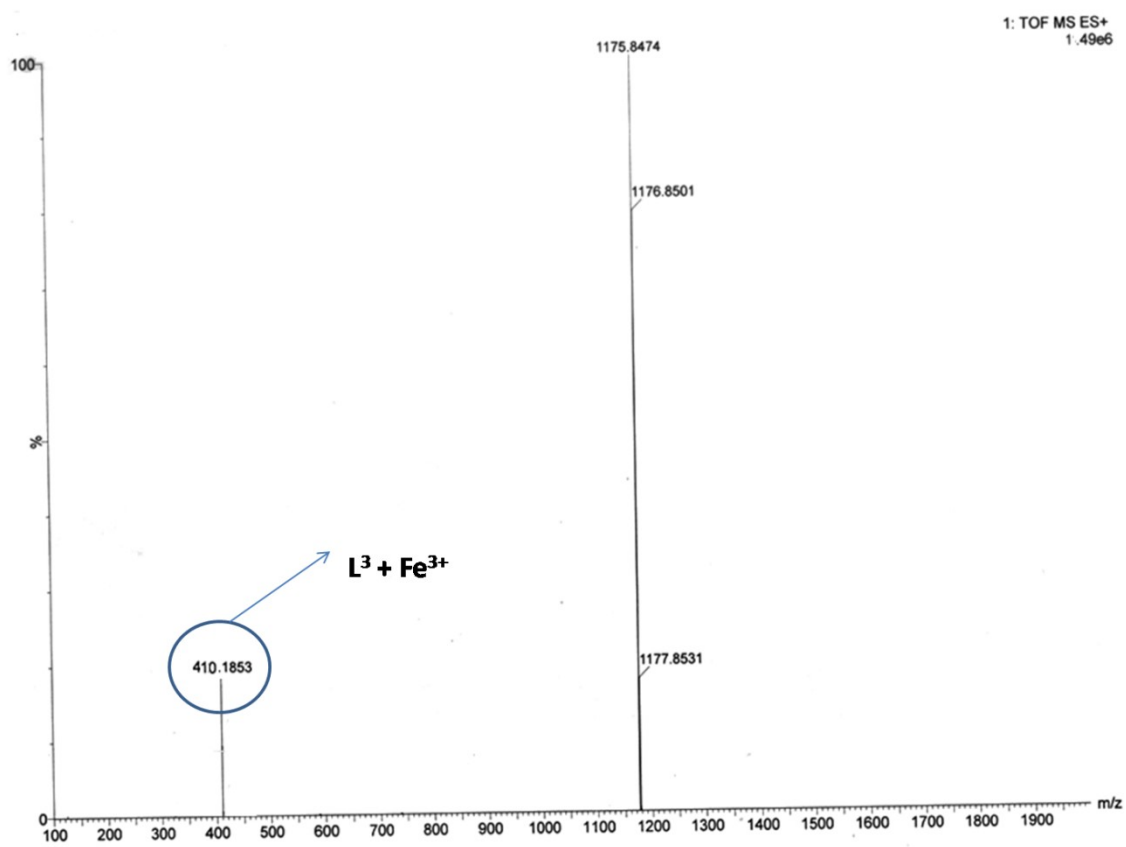

**Fig. S3b.** Mass spectroscopy of  $[L^3 + Fe^{3+}]$  in MeCN.



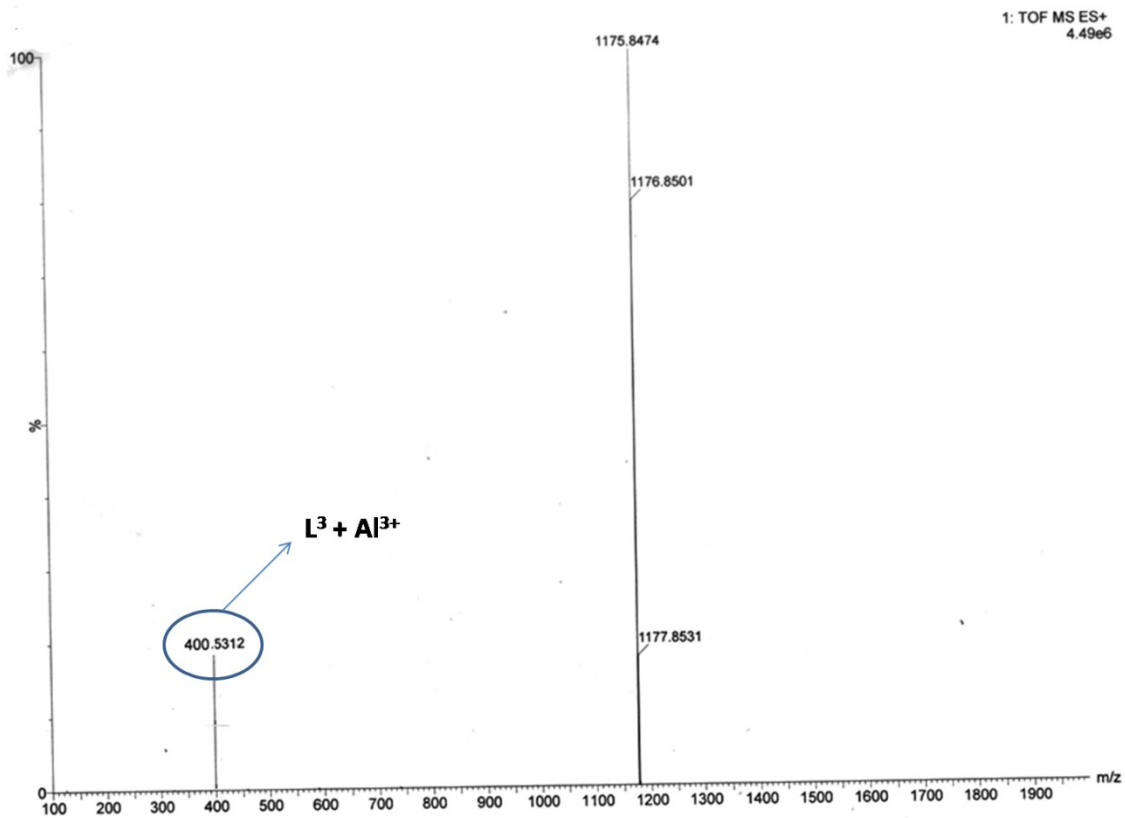

**Fig. S3c.** Mass spectroscopy of  $[L^3 + Al^{3+}]$  in MeCN.

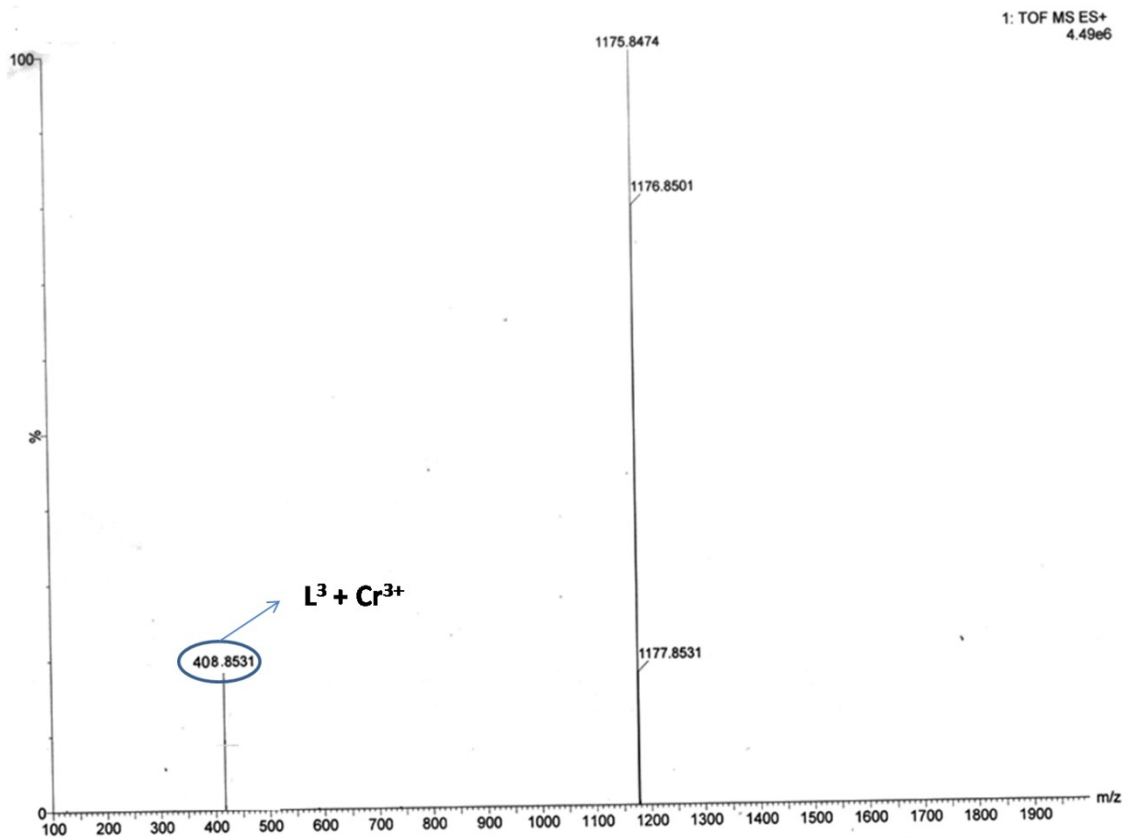

**Fig. S3d.** Mass spectroscopy of  $[L^3 + Cr^{3+}]$  in MeCN.

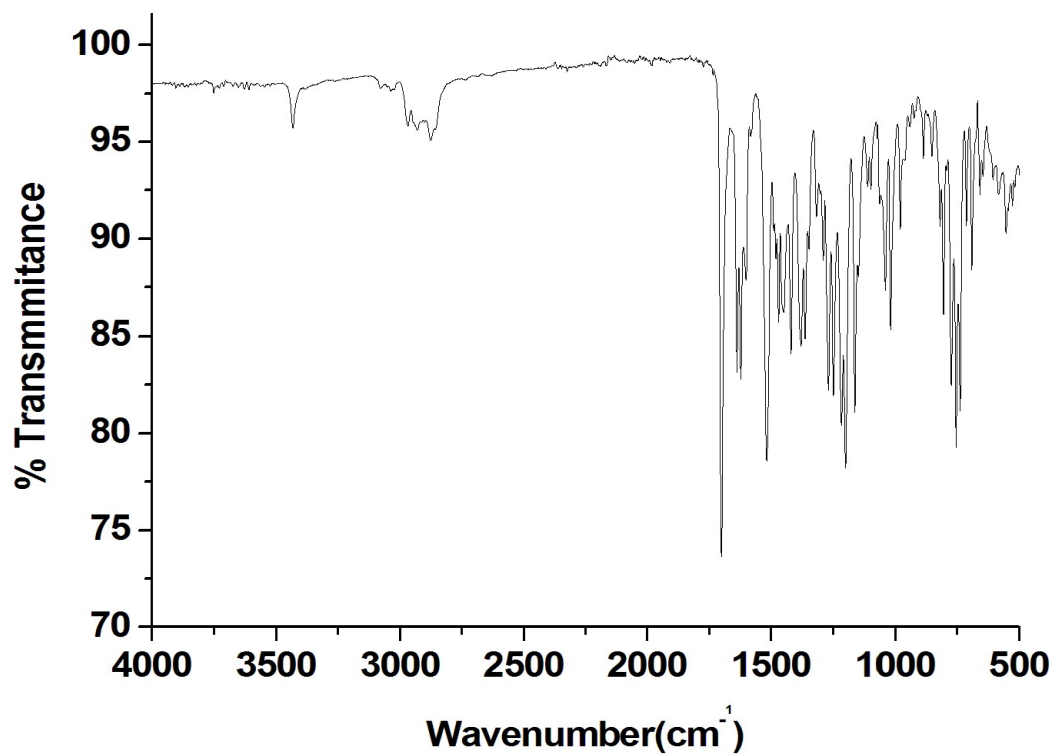

Fig. S4. FT-IR spectrum of  $L^3$

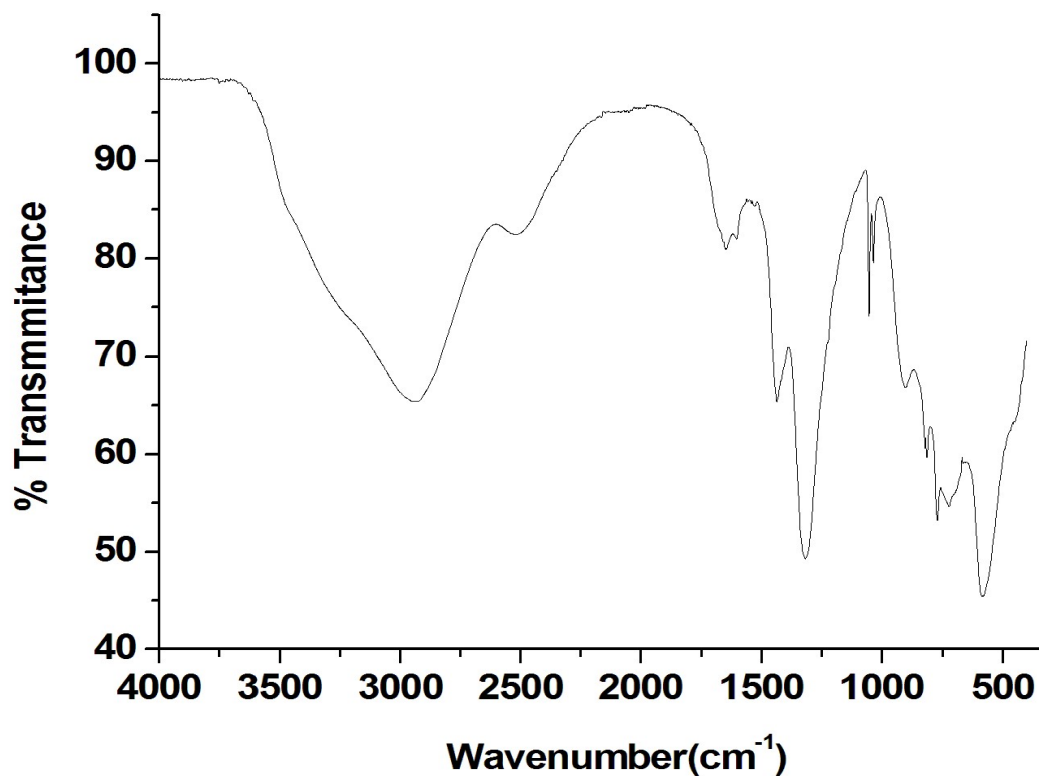

Fig. S4a. FT-IR spectrum of  $[L^3+Al^{3+}]$  Complex.

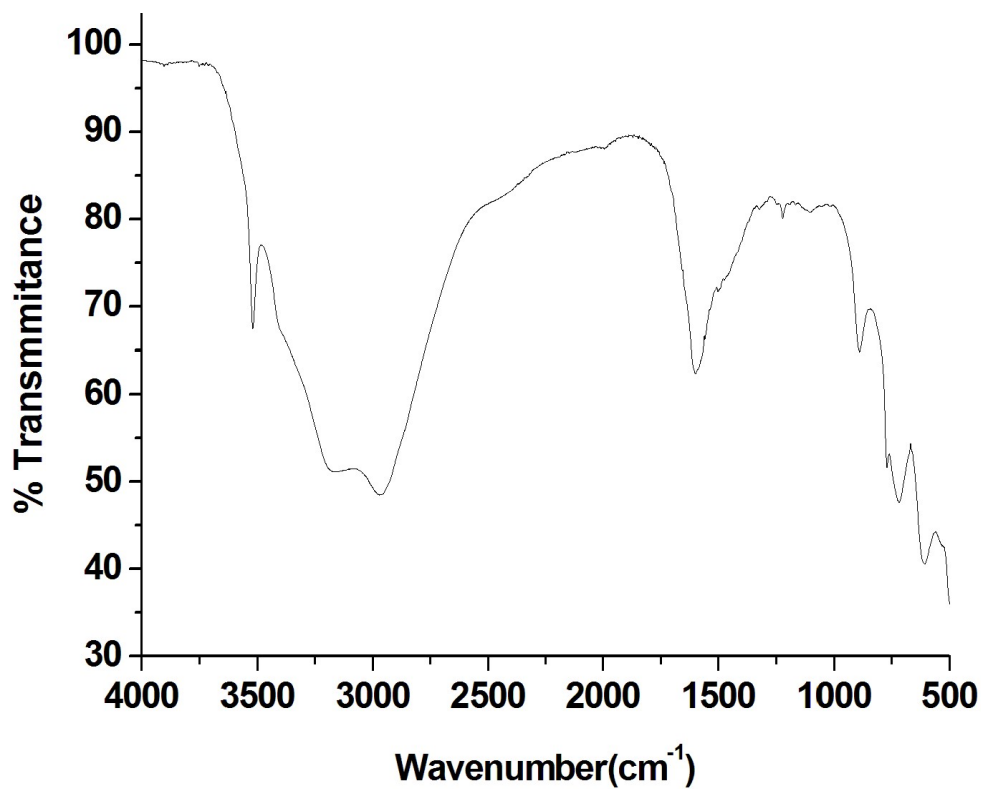

Fig. S4b. FT-IR spectrum of [L<sup>3</sup>+Cr<sup>3+</sup>]Complex.

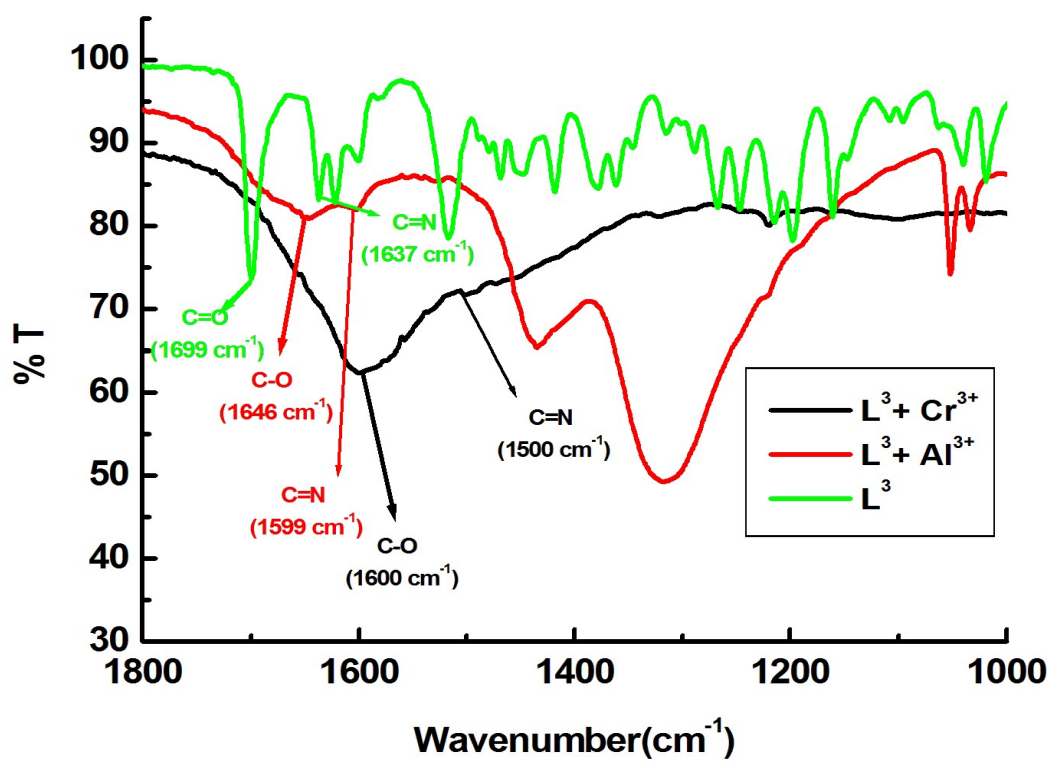

Fig.S4c. IR spectra of (L<sup>3</sup>), [L<sup>3</sup>-Al<sup>3+</sup>] and [L<sup>3</sup>-Cr<sup>3+</sup>] complexes in MeCN.

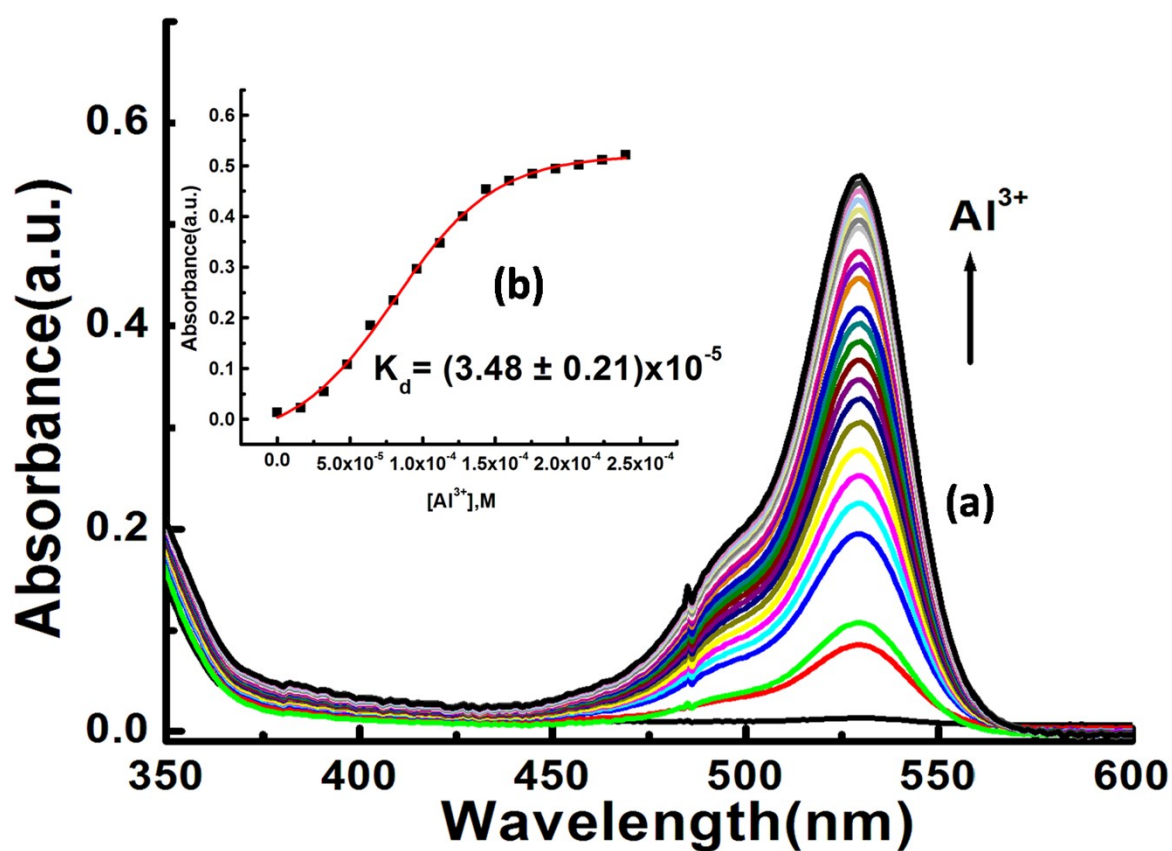

Fig. S5. (a) UV-VIS titration of L<sup>3</sup> (60 μM) in H<sub>2</sub>O- MeCN-(7:3, v/v) in HEPES buffer at pH 7.2 by the gradual addition of Al<sup>3+</sup> (0-336 μM). Inset (b) Nonlinear curve-fit of F.I vs. [Al<sup>3+</sup>] plot.

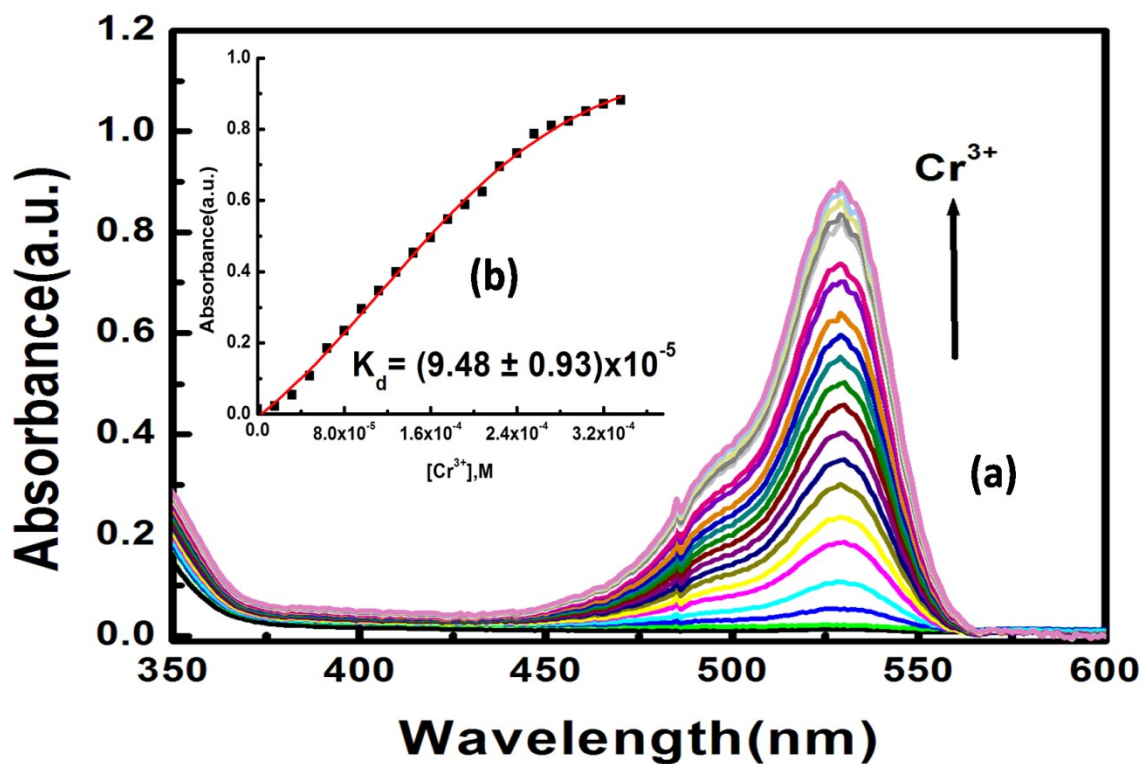

**Fig. S5a.** (a) UV-VIS titration of L<sup>3</sup> (60 μM) in H<sub>2</sub>O- MeCN-(7:3, v/v) in HEPES buffer at pH 7.2 by the gradual addition of Cr<sup>3+</sup> (0-336 μM). Inset (b) Nonlinear curve-fit of F.I vs. [Cr<sup>3+</sup>] plot.

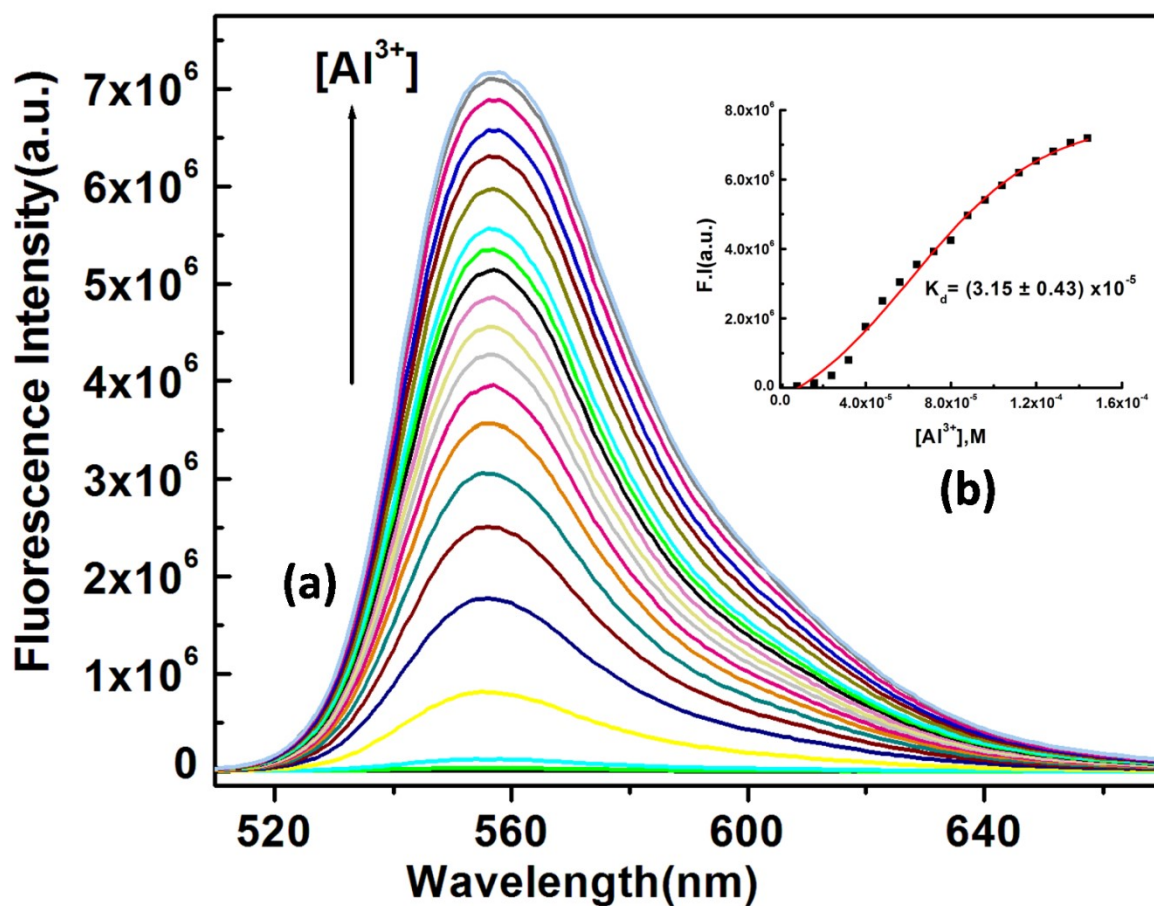

**Fig. S6.**(a) Fluorescence titration of  $L^3$  ( $60 \mu\text{M}$ ) in  $\text{H}_2\text{O}$ -  $\text{MeCN}$ - ( $7:3$ , v/v) in HEPES buffer at pH 7.2 by the gradual addition of  $Al^{3+}$  ( $0$ - $160 \mu\text{M}$ ). Inset (b) Nonlinear curve-fit of  $F_i$  vs.  $[Al^{3+}]$  plot.

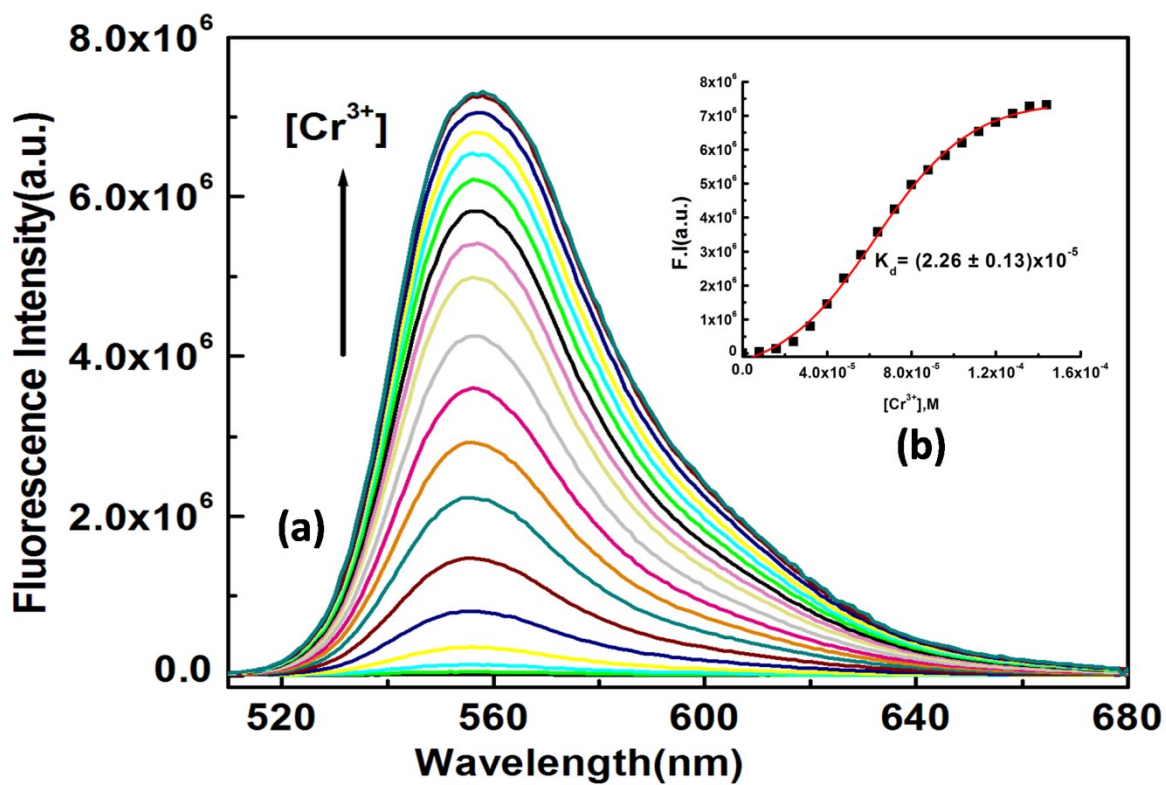

**Fig.S6a.**(a) Fluorometric titration of  $\text{L}^3$  ( $60 \mu\text{M}$ ) in  $\text{H}_2\text{O}$ -  $\text{MeCN}$ - ( $7:3$ , v/v) in HEPES buffer at pH 7.2 by the gradual addition of  $\text{Cr}^{3+}$  ( $0$ - $160 \mu\text{M}$ ). Inset (b) Nonlinear curve-fit of F.I vs.  $[\text{Cr}^{3+}]$  plot.



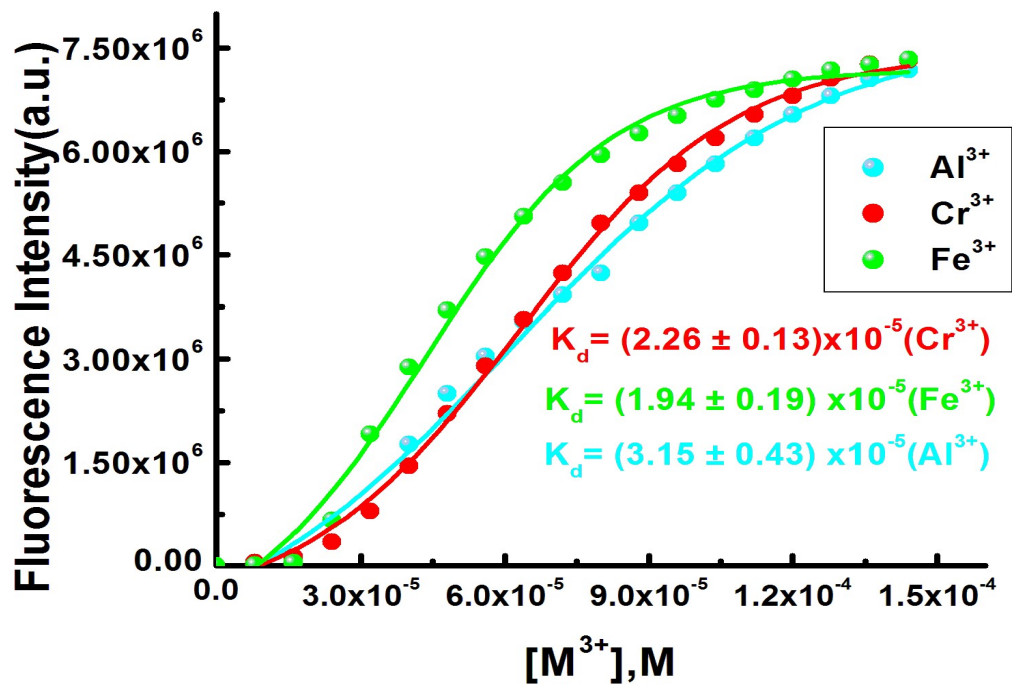

Fig.S6b. Non-linear fitting of fluorescence titration curves for  $Fe^{3+}$ ,  $Al^{3+}$  and  $Cr^{3+}$  with  $K_d$  values.

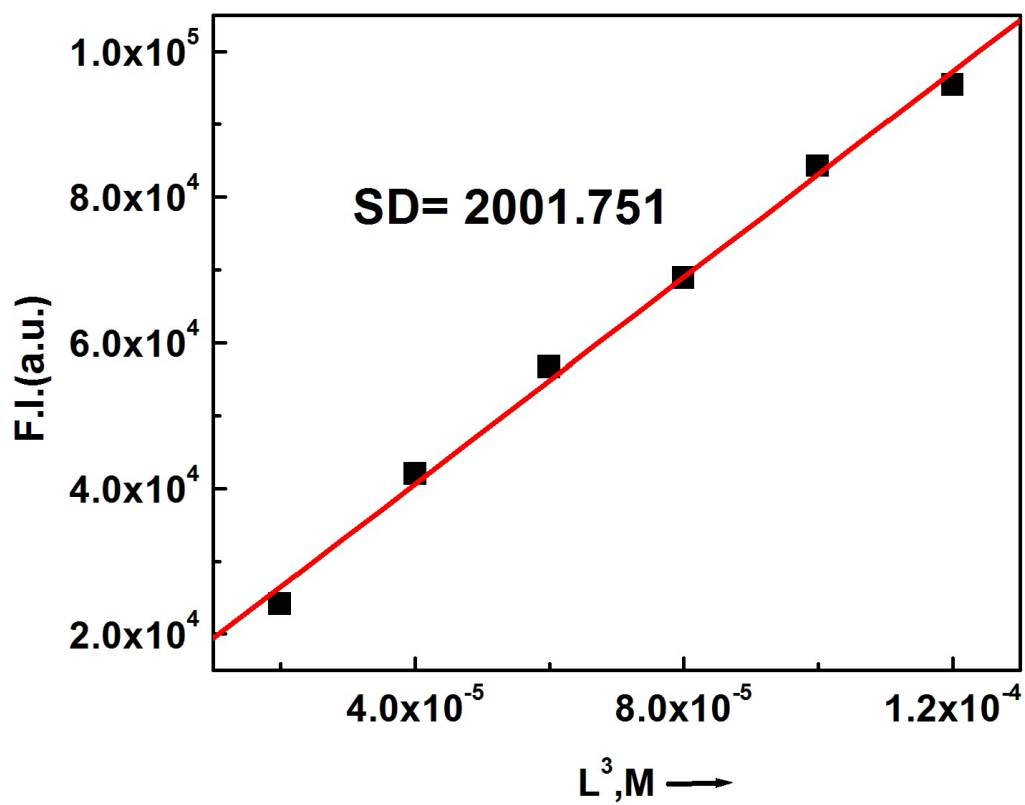

Fig. S7. Determination of S.D. of the blank, ligand( $L^3$ ) solution.

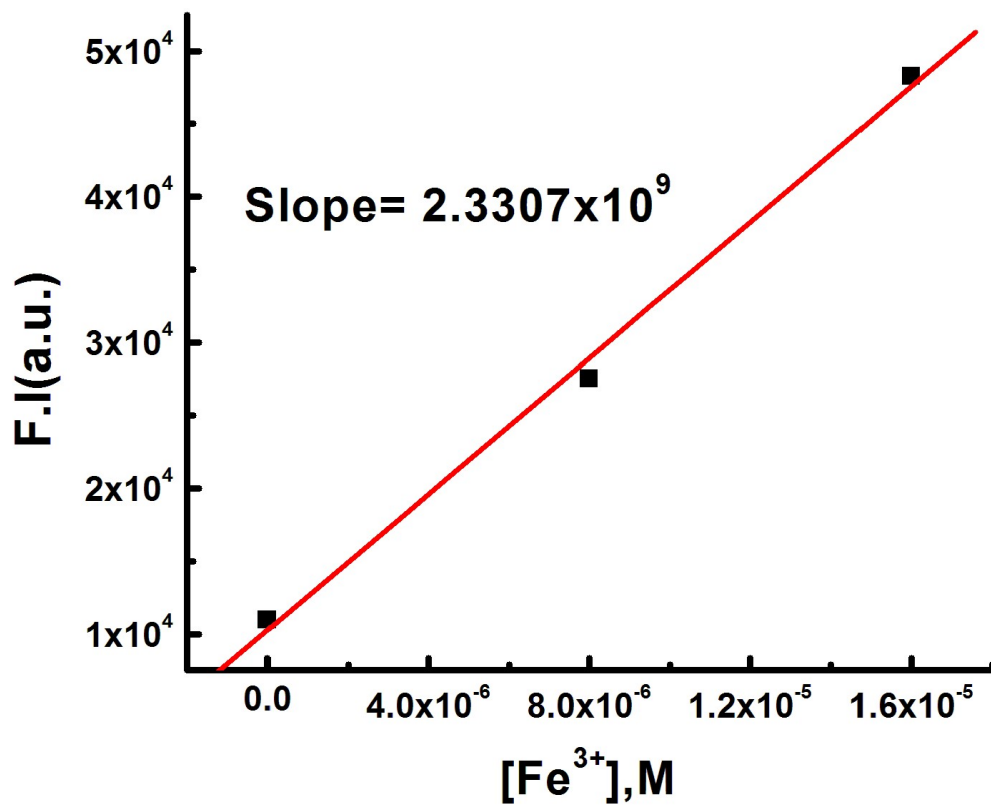

Fig.S8. Linear dynamic plot of FI (at 558nm) vs [Fe<sup>3+</sup>] for the determination of S (slope).

$$\text{LOD}(\text{Fe}^{3+}) = 3 \times \text{S.D}/\text{Slope}$$

$$= (3 \times 2001.751 / 2.3307 \times 10^9)$$

$$= 2.57 \mu\text{M}$$

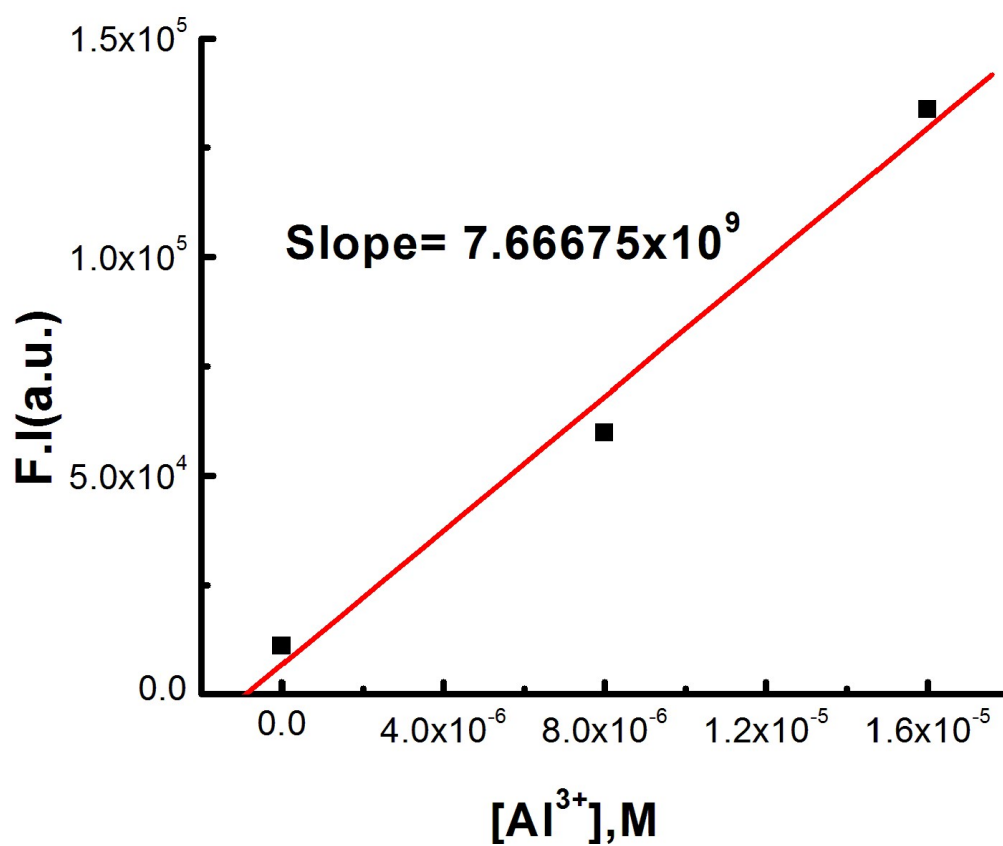

**Fig.S8a.** Linear dynamic plot of FI (at 558nm) vs [Al³⁺] for the determination of S (slope).

$$\text{LOD}(\text{Al}^{3+}) = 3 \times \text{S.D.} / \text{Slope}$$

$$= (3 \times 2001.751) / 7.66675 \times 10^9$$

$$= 0.78 \mu\text{M}$$

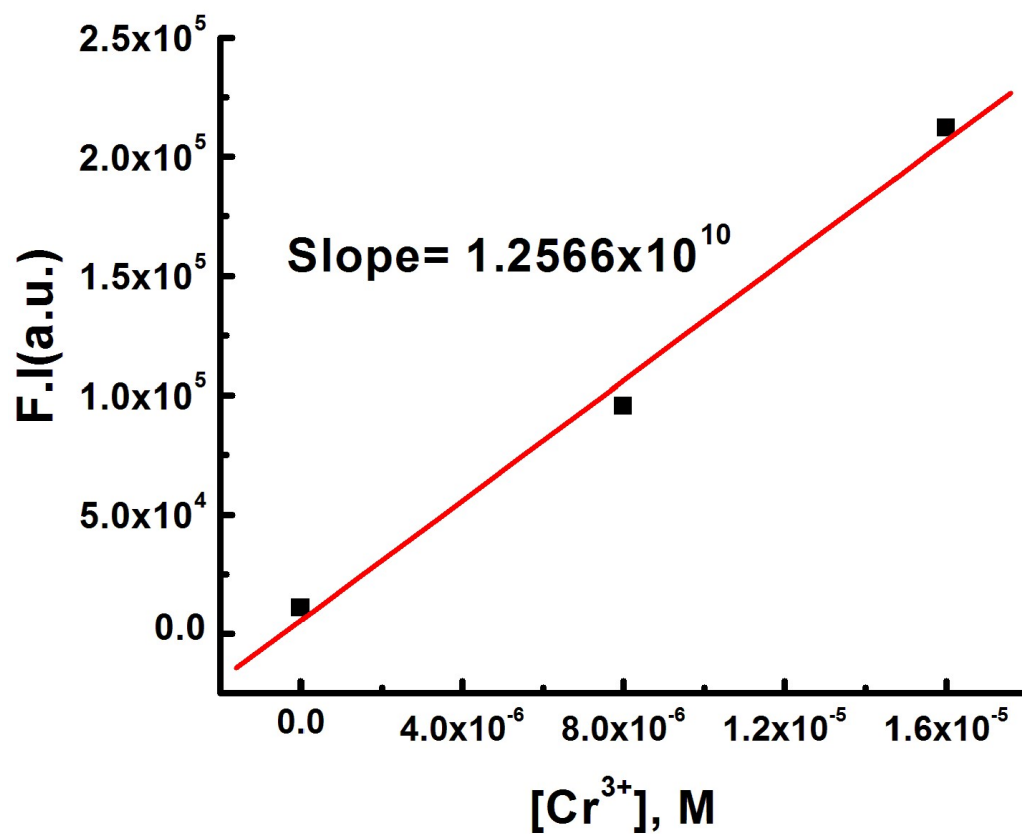

**Fig.S8b.** Linear dynamic plot of FI (at 558nm) vs [Cr<sup>3+</sup>] for the determination of S (slope).

$$\text{LOD}(\text{Cr}^{3+}) = 3 \times \text{S.D./Slope}$$

$$= (3 \times 2001.751 / 1.2566 \times 10^{10})$$

$$= 0.47 \mu\text{M}$$

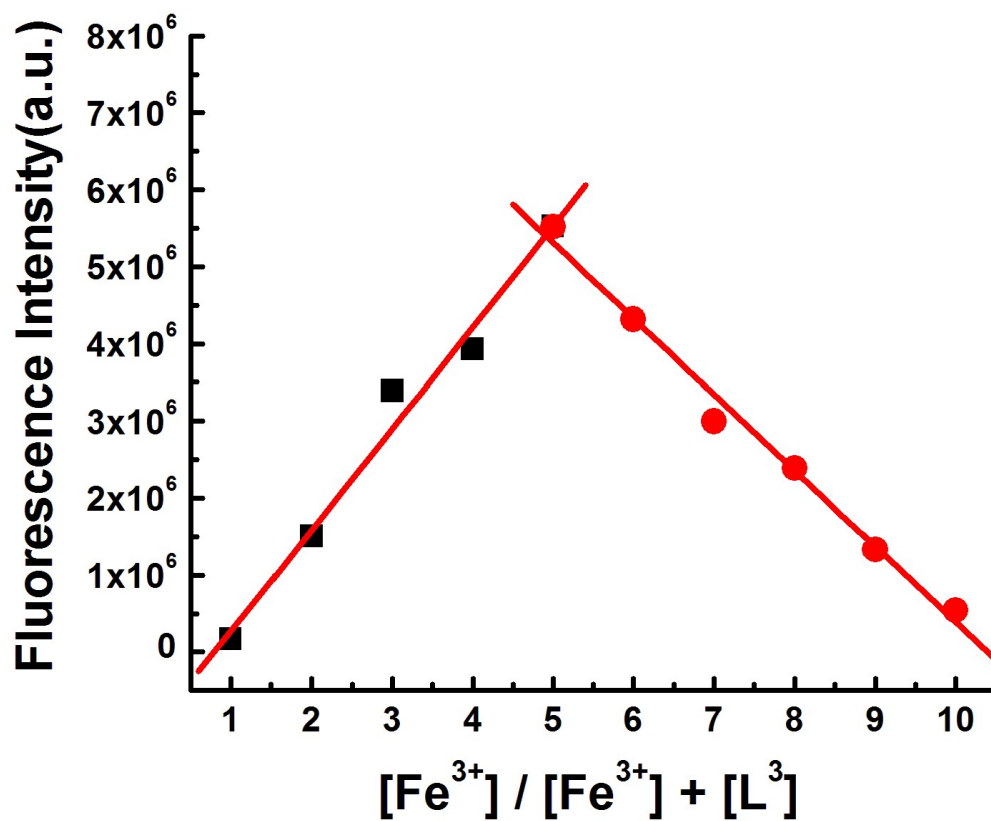

Fig. S9. Job's plot between L<sup>3</sup> and Fe<sup>3+</sup> for the confirmation of (1:1) binding.

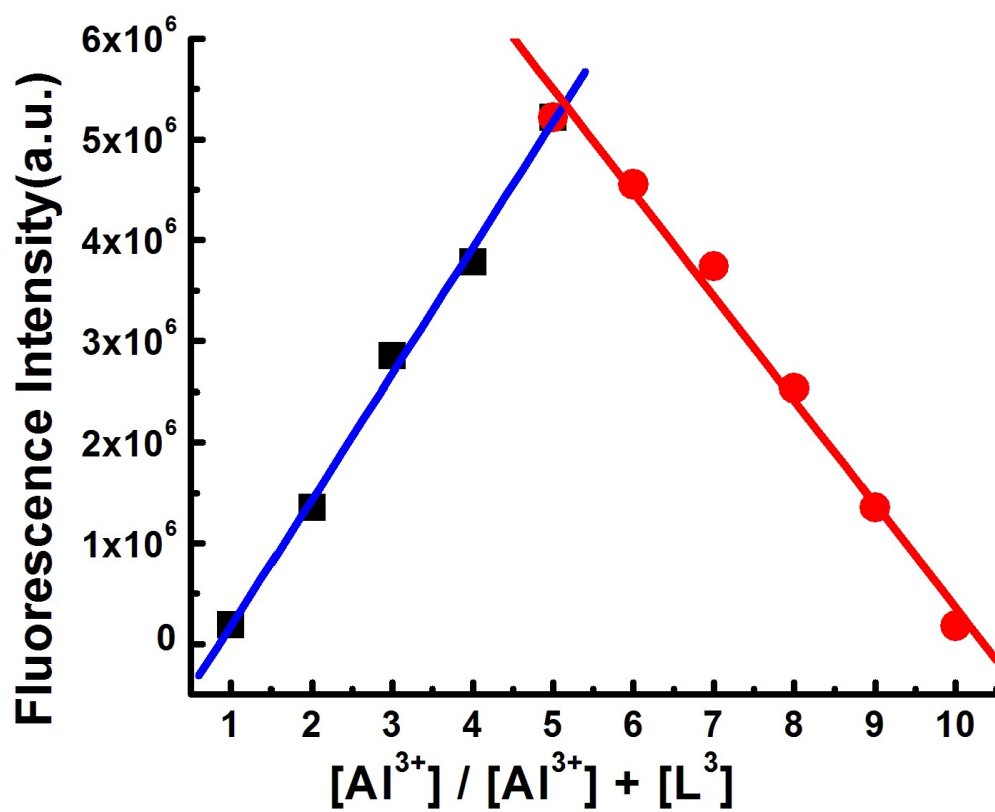

Fig. S9a. Job's plot between  $\text{L}^3$  and  $\text{Al}^{3+}$  for the confirmation of (1:1) binding.

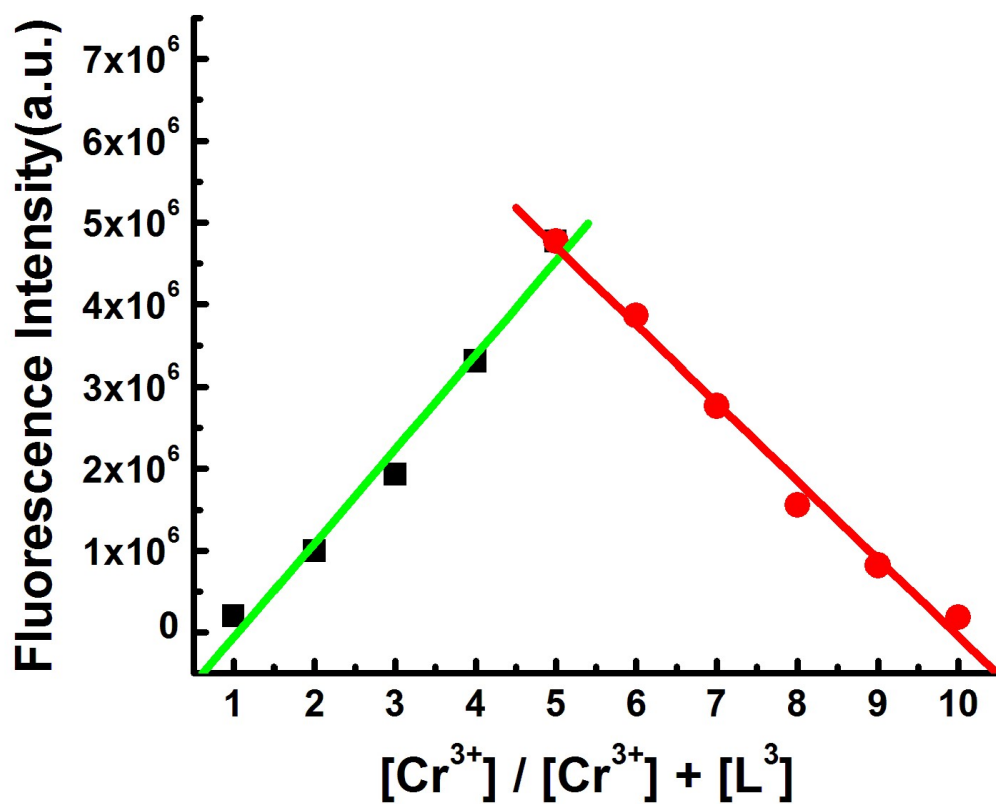

Fig. S9b. Job's plot between L<sup>3</sup> and Cr<sup>3+</sup> for the confirmation of (1:1) binding.



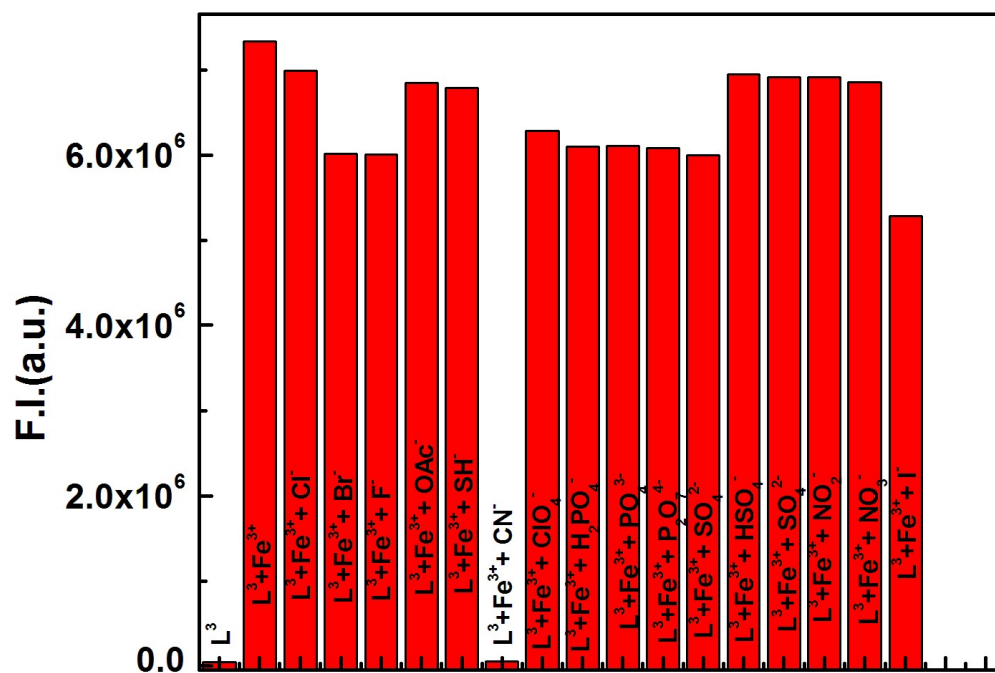

**Fig. S10.** Histogram of the fluorescence quenching [L<sup>3</sup>-Fe<sup>3+</sup>] complex by CN<sup>-</sup> (100 μM) towards L<sup>3</sup> (60 μM) in H<sub>2</sub>O- MeCN-(7:3, v/v) in presence of different anions(100μM) in HEPES buffer at pH 7.2 with  $\lambda_{\text{ex}} = 502 \text{ nm}$ ,  $\lambda_{\text{em}} = 558 \text{ nm}$ .

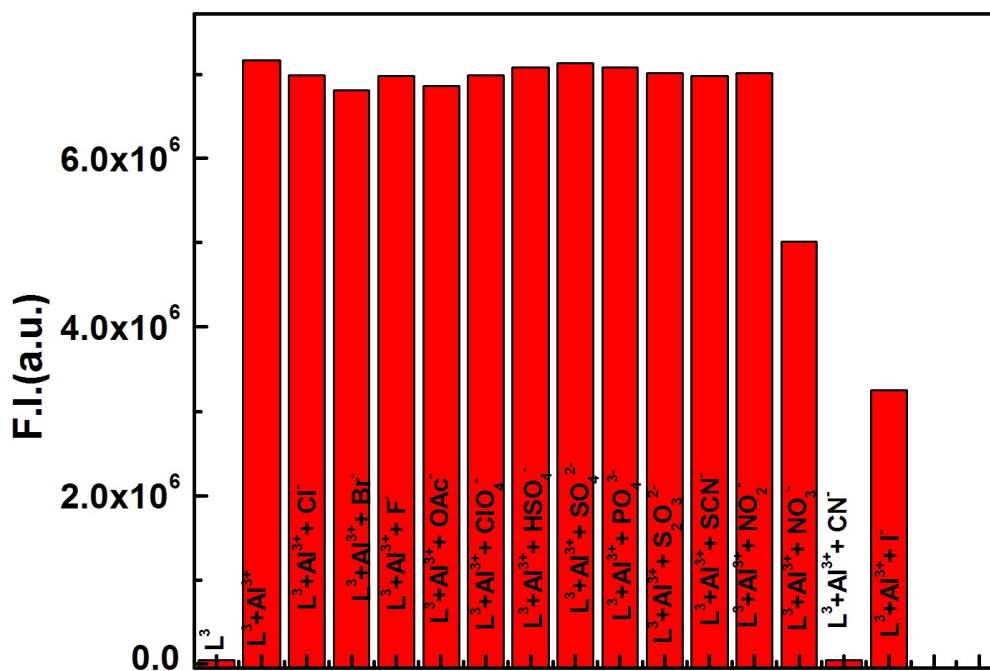

**Fig. S10a.** Histogram of the fluorescence quenching [L<sup>3</sup>-Al<sup>3+</sup>] complex by CN<sup>-</sup> (100 μM) towards L<sup>3</sup> (60 μM) in H<sub>2</sub>O- MeCN-(7:3, v/v) in presence of different anions(100μM)in HEPES buffer at pH 7.2 with  $\lambda_{\text{ex}} = 502 \text{ nm}$ ,  $\lambda_{\text{em}} = 558 \text{ nm}$ .

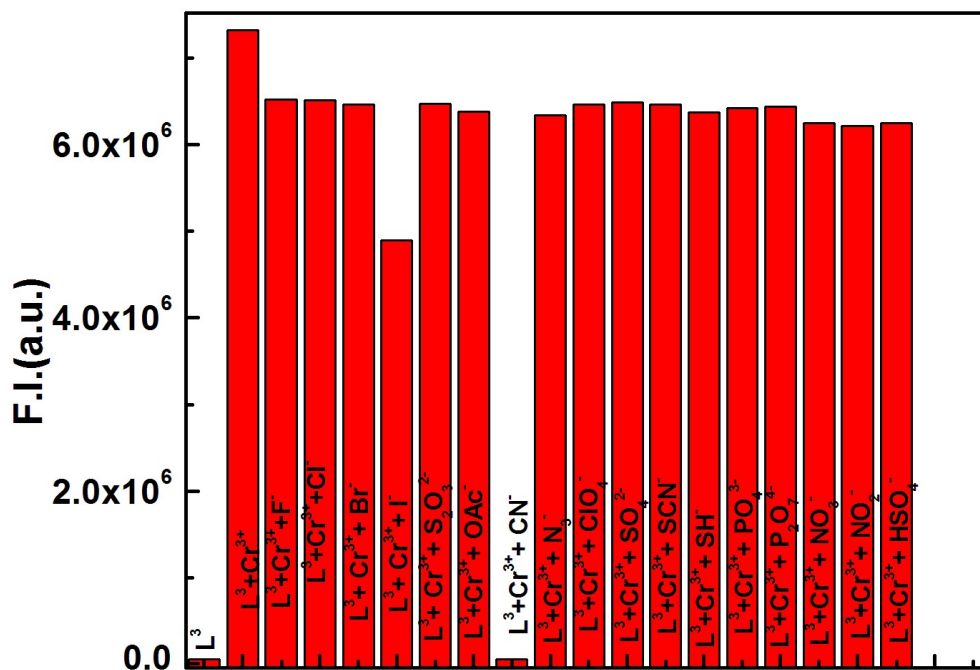

**Fig. S10b.** Histogram of the fluorescence quenching [L<sup>3</sup>-Cr<sup>3+</sup>] complex by CN<sup>-</sup> (100 μM) towards L<sup>3</sup> (60 μM) in H<sub>2</sub>O- MeCN-(7:3, v/v) in presence of different anions (100 μM) in HEPES buffer at pH 7.2 with λ<sub>ex</sub> = 502 nm, λ<sub>em</sub> = 558 nm.

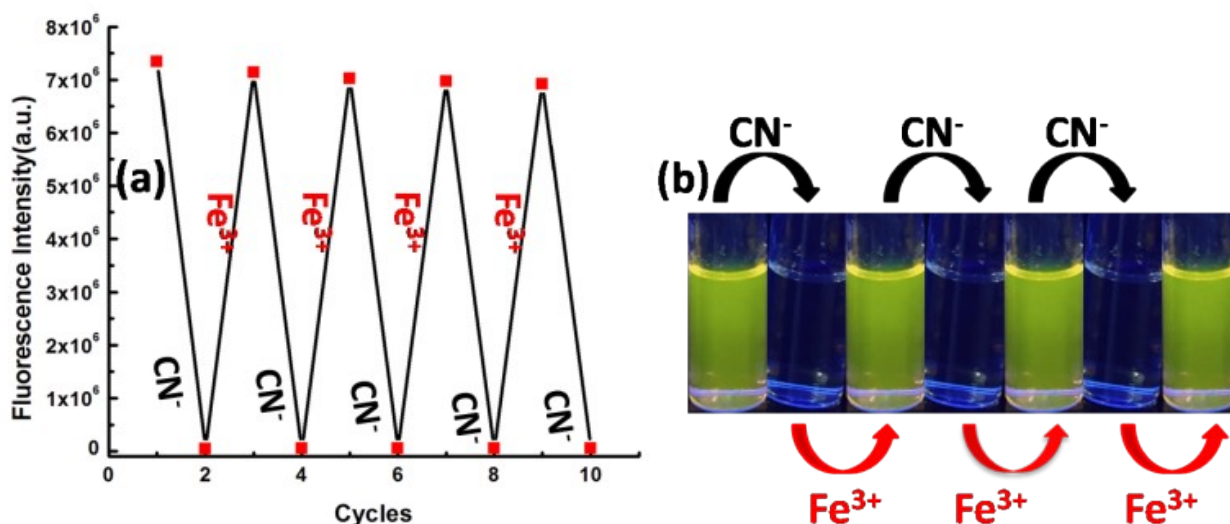

**Fig. S10c.** Fluorescence experiment to show the reversibility and reusability of the receptor for sensing Fe<sup>3+</sup> by alternate addition of CN<sup>-</sup>. (a) Fluorescence intensity obtained during the titration of L<sup>3</sup>-Fe<sup>3+</sup> with CN<sup>-</sup> followed by the addition of Fe<sup>3+</sup>. (b) Fluorescent color changes after each addition of CN<sup>-</sup> and Fe<sup>3+</sup> sequentially.

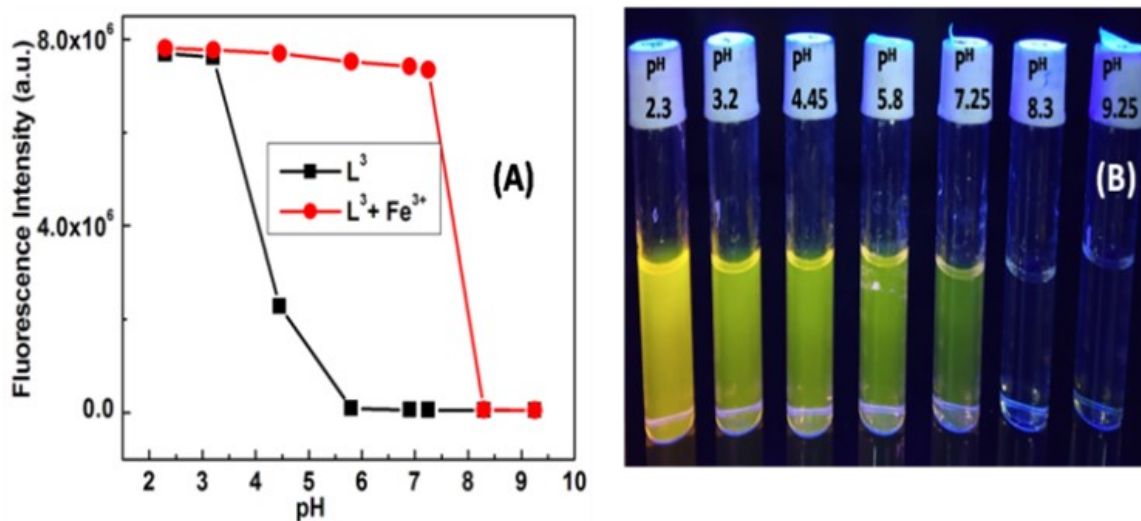

Fig.S11. (A) pH dependence of fluorescence responses of  $L^3$  and its  $[L^3-Fe^{3+}]$  complex; (B) Fluorescent response of  $L^3$  towards  $Fe^{3+}$  at different pH.

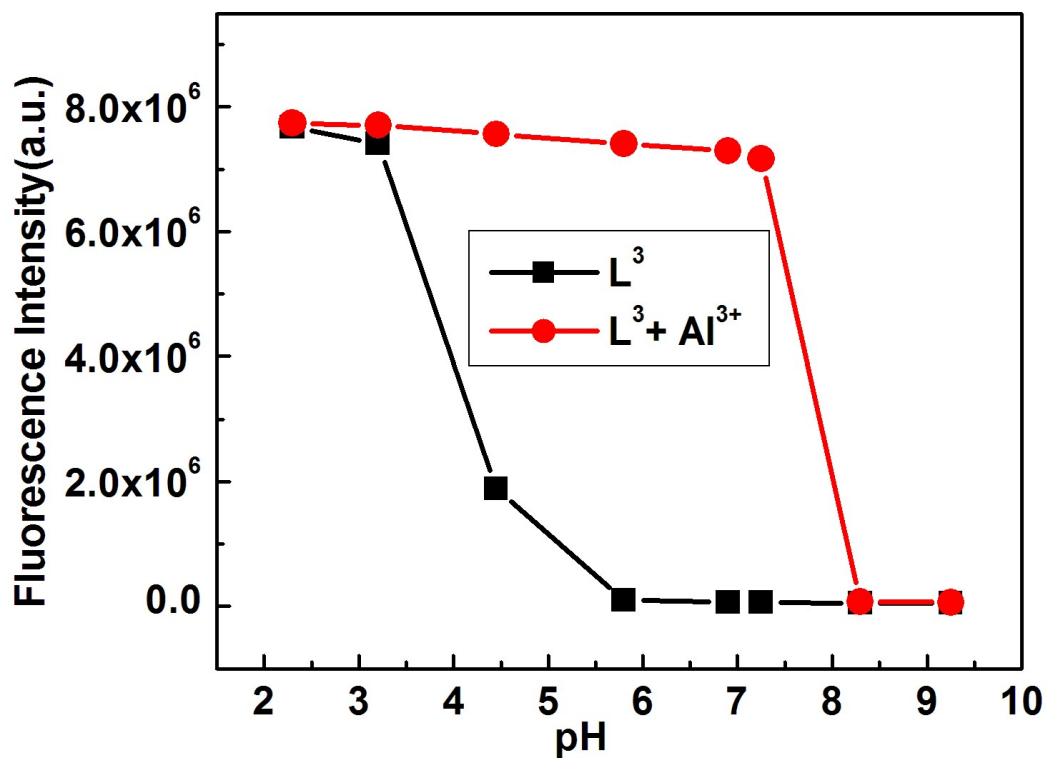

Fig. S11a. Fluorescence intensity observed at different pH for  $L^3$  and  $[L^3+Al^{3+}]$  ( $60 \mu M$ ) in  $H_2O/CH_3CN$  (7:3,v/v) with  $\lambda_{ex} = 502 \text{ nm}$ ,  $\lambda_{em} = 558 \text{ nm}$ .

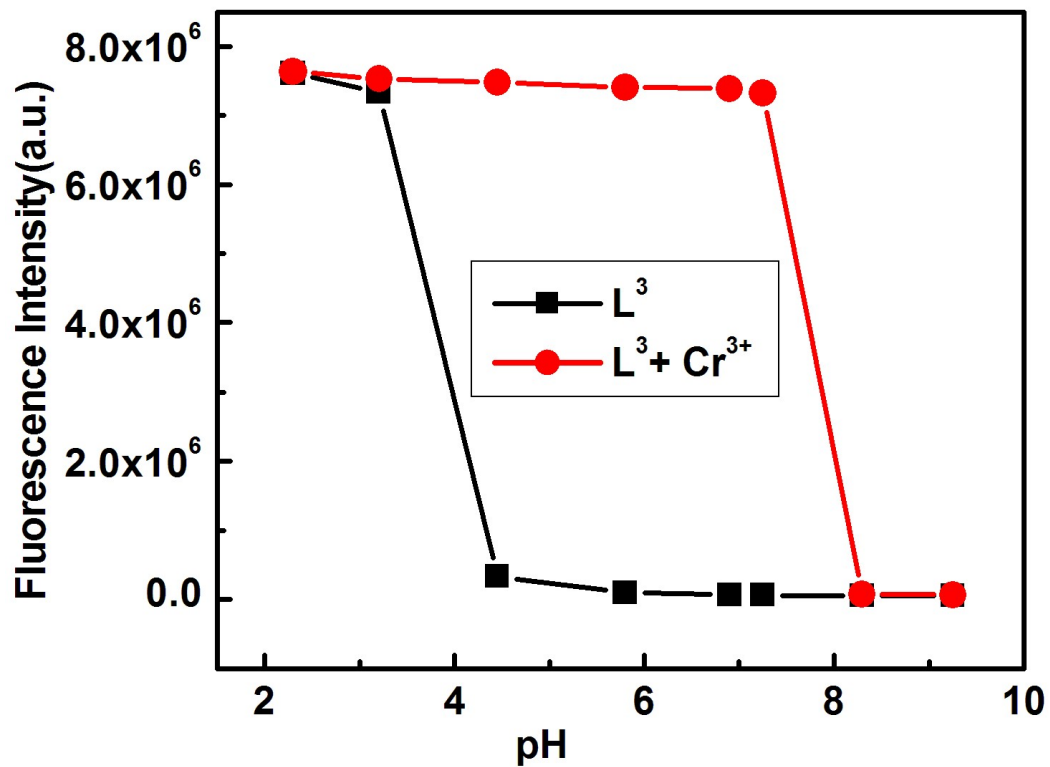

Fig. S11b. Fluorescence intensity observed at different pH for L<sup>3</sup> and [L<sup>3</sup>+Cr<sup>3+</sup>] (60 μM) in H<sub>2</sub>O/CH<sub>3</sub>CN (7:3,v/v) with  $\lambda_{\text{ex}} = 502 \text{ nm}$ ,  $\lambda_{\text{em}} = 558 \text{ nm}$ .

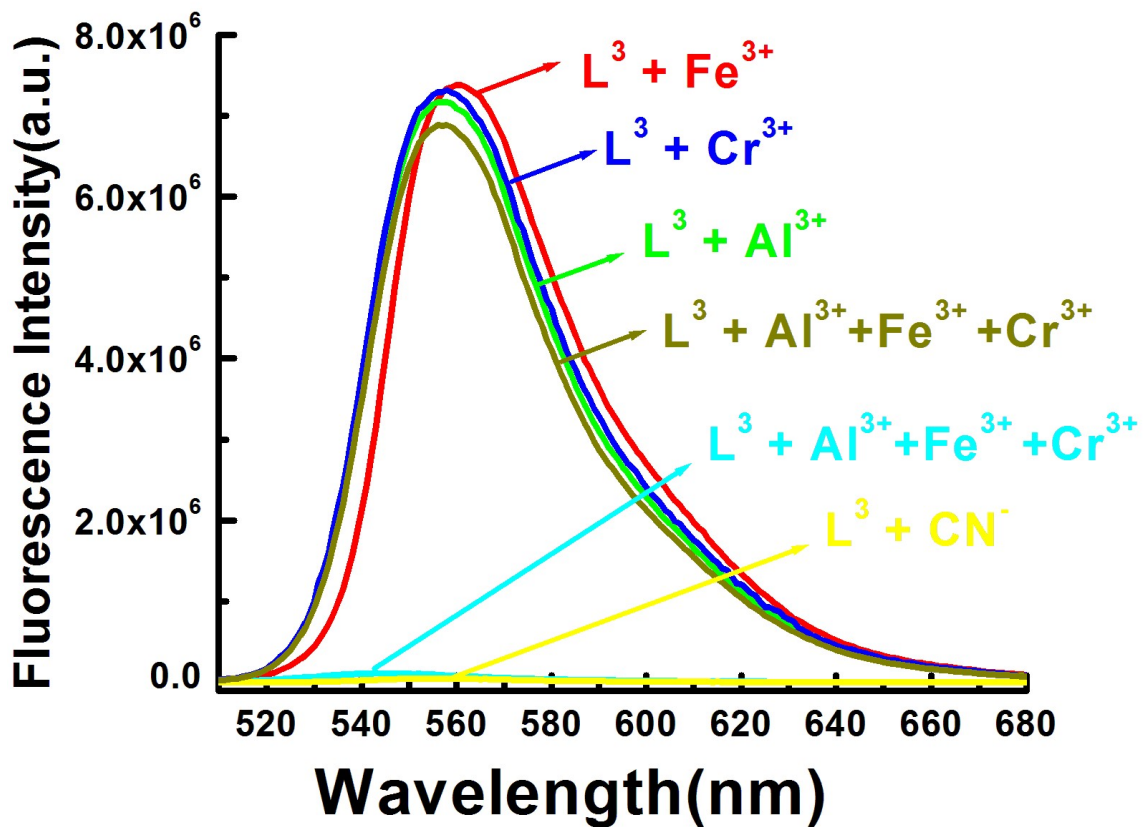

Fig. S12. Four-input OR-INHIBIT logic gate representation of the emission of  $L^3$  with different input when monitoring the emission at 558 nm.

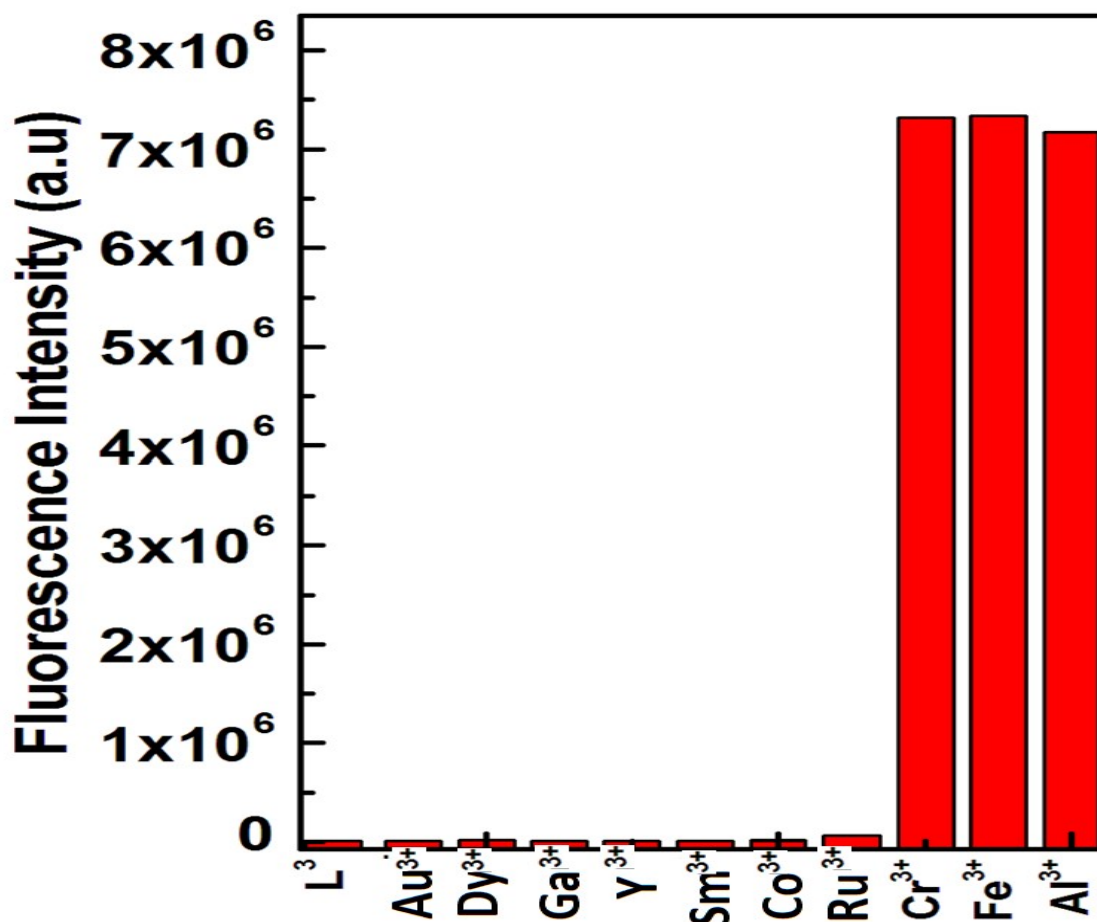

Fig. S13. Fluorescence response of the probe  $L^3$  in the presence of Au(III), Dy(III), Ga(III), Y(III), Sm(III), Ru(III) and Co(III) with respect to  $Fe^{3+}$ ,  $Al^{3+}$  and  $Cr^{3+}$

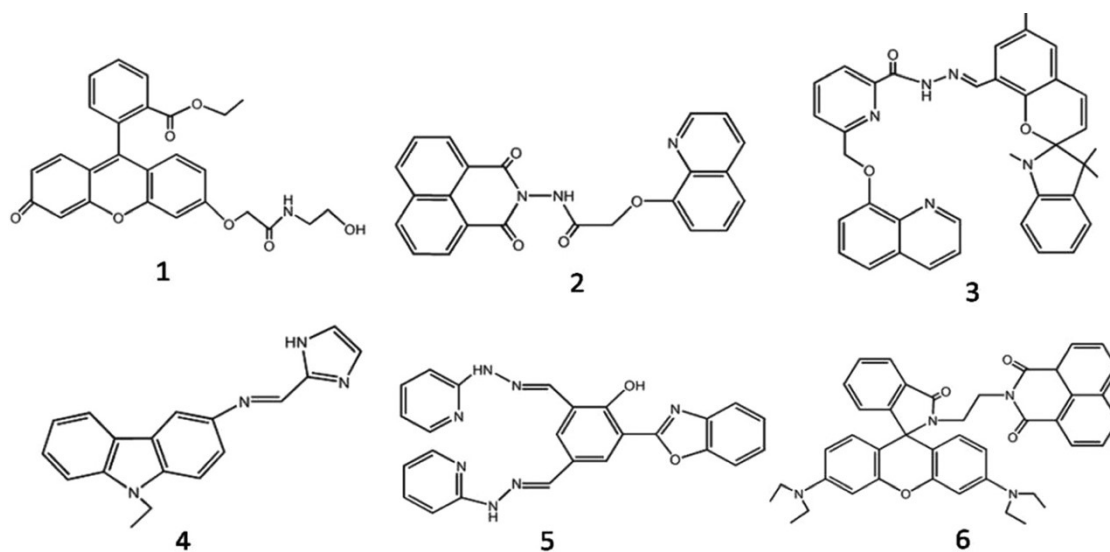

Fig. S14. Some previously representative trivalent sensors.

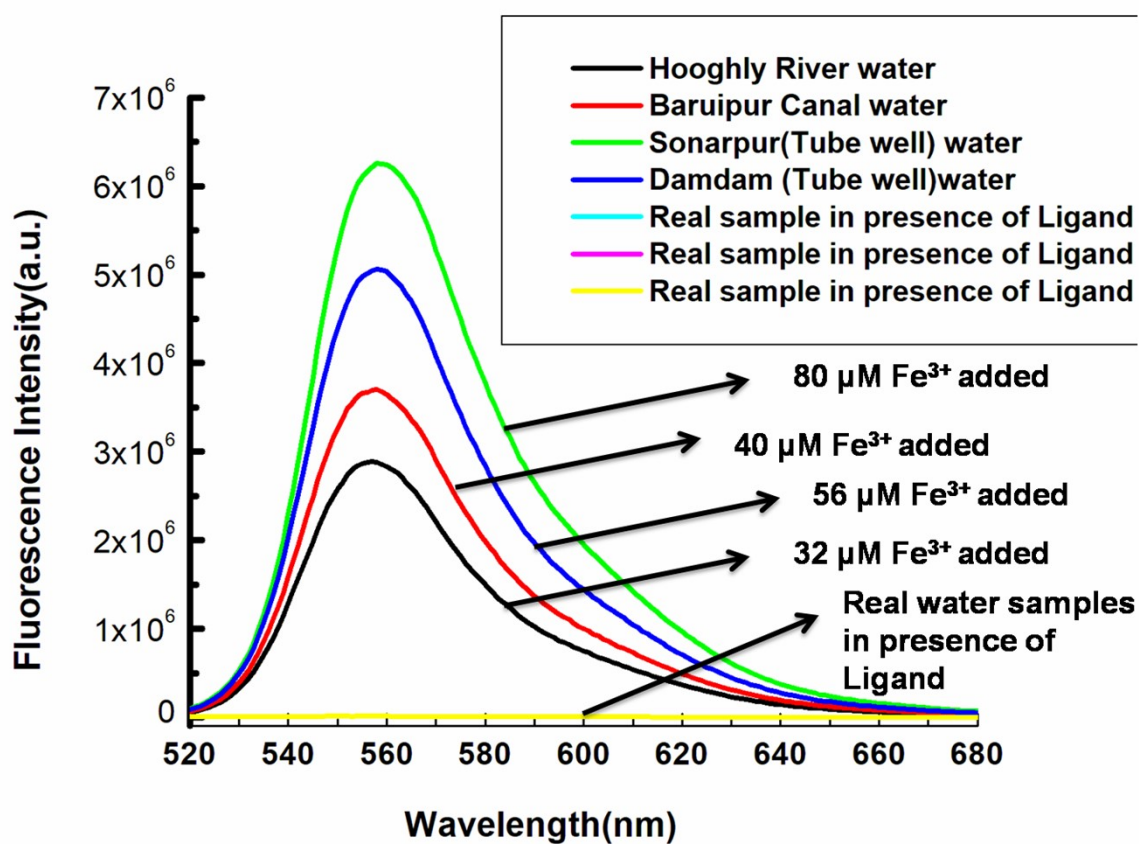

Fig. S15. Real water sample tested with the probe



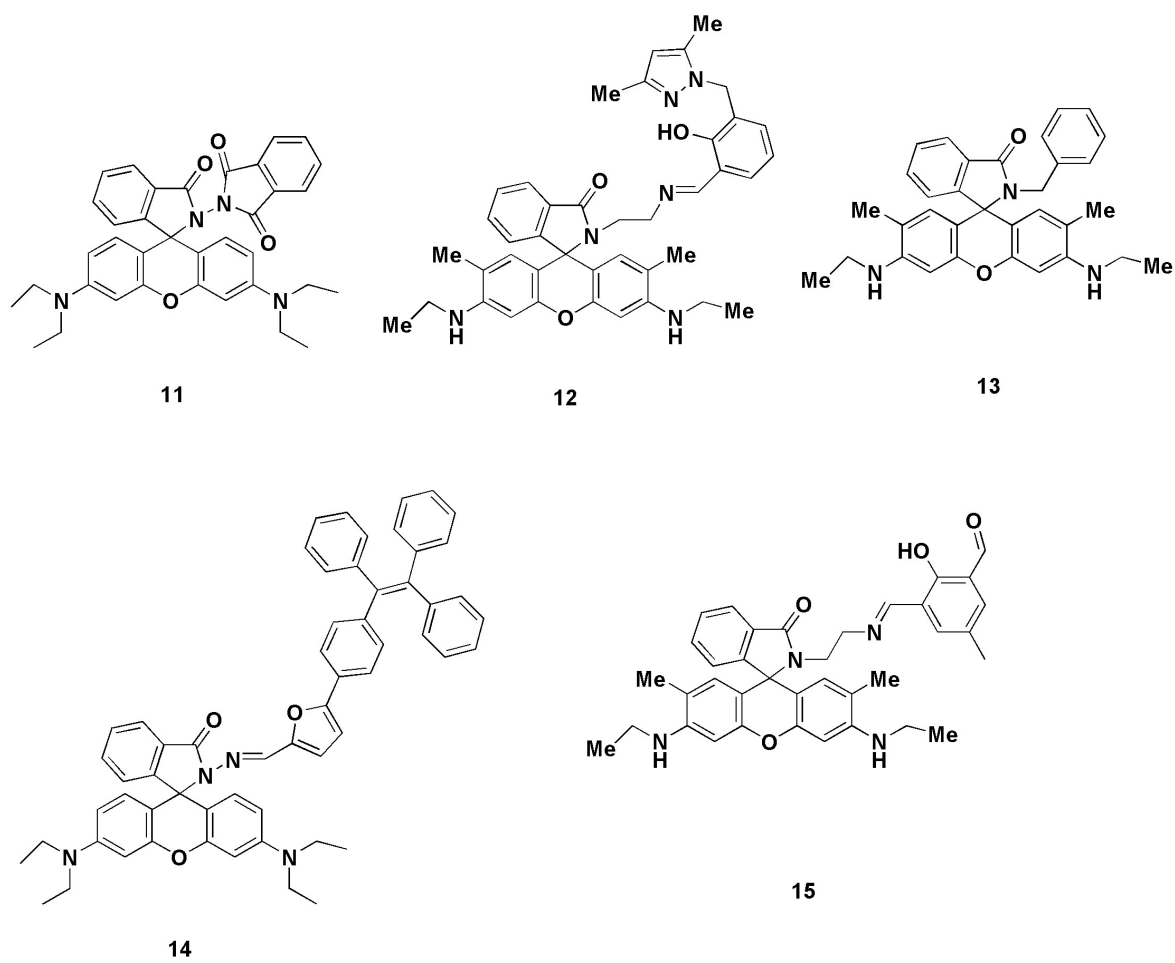

**Fig. S16.** Some previously reported rhodamine based trivalent sensors.

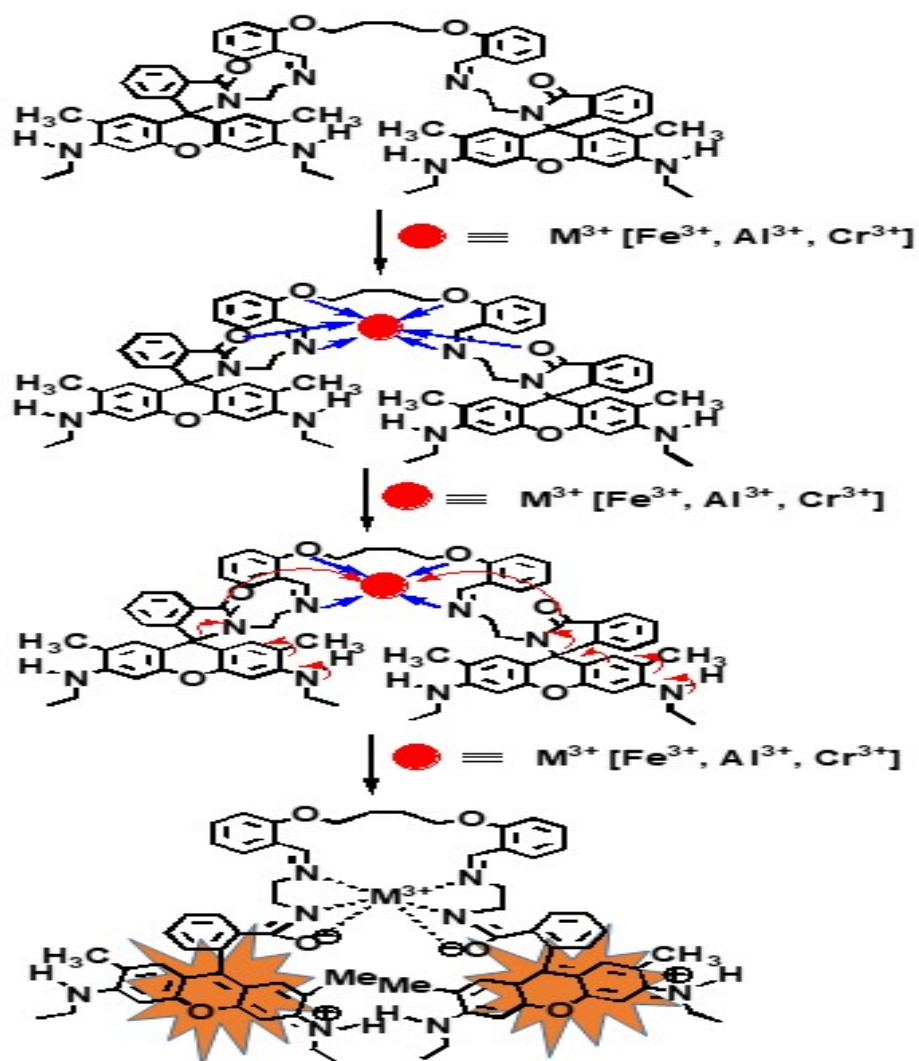

**Scheme S1.** Mechanism of spiroactum ring opening in the presence of  $M^{3+}$  ( $M=Fe, Cr, Al$ ).

**Table S1.** A list of trivalent sensors along with some important parameters

| Probe | Solvent                                                         | $\lambda_{\text{ex}} (\lambda_{\text{em}})/ \text{nm}$ | LOD                                                                                                                                          | $K_f(\text{M}^{-1})$                                                                                                                                                                       | Ref no. |
|-------|-----------------------------------------------------------------|--------------------------------------------------------|----------------------------------------------------------------------------------------------------------------------------------------------|--------------------------------------------------------------------------------------------------------------------------------------------------------------------------------------------|---------|
| 1     | Pure CH <sub>3</sub> CN                                         | 437(475)                                               | 0.5 $\mu\text{M}$ (Cr <sup>3+</sup> )<br>0.3 $\mu\text{M}$ (Al <sup>3+</sup> )<br>0.2 $\mu\text{M}$ (Fe <sup>3+</sup> )                      | 1.58 x 10 <sup>4</sup> M <sup>-1</sup> (Cr <sup>3+</sup> );<br>6.46 x 10 <sup>9</sup> M <sup>-2</sup> (Al <sup>3+</sup> )<br>1.26 x 10 <sup>5</sup> M <sup>-1</sup> (Fe <sup>3+</sup> );   | 1       |
| 2     | CH <sub>3</sub> CN–HEPES buffer solution (40/60, v/v, pH = 7.4) | 342 (484)                                              | 25 $\mu\text{M}$ (Cr <sup>3+</sup> )<br>23 $\mu\text{M}$ (Al <sup>3+</sup> )<br>20 $\mu\text{M}$ (Fe <sup>3+</sup> )                         | 1.0852 x 10 <sup>4</sup> M <sup>-1</sup> (Fe <sup>3+</sup> )<br>8.770 x 10 <sup>3</sup> M <sup>-1</sup> (Al <sup>3+</sup> )<br>5.676 x 10 <sup>3</sup> M <sup>-1</sup> (Cr <sup>3+</sup> ) | 2       |
| 3     | CH <sub>3</sub> CN–HEPES buffer solution (1:1 , pH = 7.4)       | 460 (675)                                              | 93 nM(Cr <sup>3+</sup> )<br>32 nM (Al <sup>3+</sup> )<br>90 nM(Fe <sup>3+</sup> )                                                            | Not determined                                                                                                                                                                             | 3       |
| 4     | THF–H <sub>2</sub> O (8:2) mixture                              | 330 (430)                                              | 0.36 nM (Cr <sup>3+</sup> )<br>0.38 nM ( Fe <sup>3+</sup> )<br>0.38 nM (Al <sup>3+</sup> )                                                   | Not determined                                                                                                                                                                             | 4       |
| 5     | H <sub>2</sub> O:EtOH = 8:2                                     | 390(563)<br>390(527)                                   | 0.20 $\mu\text{M}$ (Cr <sup>3+</sup> )<br>0.50 $\mu\text{M}$ (Al <sup>3+</sup> )                                                             | 5.50 x 10 <sup>4</sup> M <sup>-1</sup> (Cr <sup>3+</sup> )<br>2.00x 10 <sup>4</sup> M <sup>-1</sup> (Al <sup>3+</sup> );                                                                   | 5       |
| 6     | CH <sub>3</sub> OH–H <sub>2</sub> O (6 : 4, v/v)                | 330(582)                                               | 1.74 nM (Al <sup>3+</sup> )<br>2.36 $\mu\text{M}$ (Cr <sup>3+</sup> )<br>2.90 $\mu\text{M}$ ( Fe <sup>3+</sup> )                             | 1 x 10 <sup>4</sup> M <sup>-1</sup> (Al <sup>3+</sup> );<br>2.6 x 10 <sup>2</sup> M <sup>-1</sup> (Cr <sup>3+</sup> )<br>1.2 x 10 <sup>2</sup> M <sup>-1</sup> (Fe <sup>3+</sup> );        | 6       |
| 7     | CH <sub>3</sub> CN                                              | Colorimetric                                           | 2.16 × 10 <sup>-6</sup> M(Al <sup>3+</sup> )<br>1.27 × 10 <sup>-8</sup> M(Cr <sup>3+</sup> )<br>5.03 × 10 <sup>-8</sup> M(Fe <sup>3+</sup> ) | 3.451 × 10 <sup>3</sup> M <sup>-1</sup> (Al <sup>3+</sup> )<br>3.751 × 10 <sup>6</sup> M <sup>-1</sup> (Cr <sup>3+</sup> )<br>6.078 × 10 <sup>6</sup> M <sup>-1</sup> (Fe <sup>3+</sup> )  | 7       |
| 8     | Methanol:water (7:3, v/v)                                       | 500(552)                                               | 1.18nM(Al <sup>3+</sup> )<br>1.80nM(Cr <sup>3+</sup> )<br>4.04 nM(Fe <sup>3+</sup> )                                                         | 6.92 ± 0.18 $\mu\text{M}$ (Al <sup>3+</sup> )<br>4.90 ± 0.67 $\mu\text{M}$ (Fe <sup>3+</sup> )<br>6.79 ± 0.34 $\mu\text{M}$ (Cr <sup>3+</sup> )                                            | 8       |
| 9     | 1:1 methanol–water                                              | 365(509)                                               | 1.6×10 <sup>-6</sup> M(Al <sup>3+</sup> )<br>2.66×10 <sup>-6</sup> M(Cr <sup>3+</sup> )<br>7.99×10 <sup>-7</sup> M(Fe <sup>3+</sup> )        | Not determined                                                                                                                                                                             | 9       |
| 10    | CH <sub>3</sub> CN                                              | 365(465)                                               | 1.06 × 10 <sup>-7</sup> M(Fe <sup>3+</sup> )<br>1.11 × 10 <sup>-7</sup> M(Cr <sup>3+</sup> )<br>1.17 × 10 <sup>-7</sup> M(Al <sup>3+</sup> ) | 2.25 × 10 <sup>6</sup> M <sup>-2</sup> (Fe <sup>3+</sup> )<br>2.24 × 10 <sup>6</sup> M <sup>-2</sup> (Cr <sup>3+</sup> )<br>2.26 × 10 <sup>6</sup> M <sup>-2</sup> (Al <sup>3+</sup> )     | 10      |

**Table S2.** A list rhodamine based trivalent sensors along with some important parameters

| Probe | Solvent                                                                            | $\lambda_{\text{ex}}(\lambda_{\text{em}})/$<br>nm | LOD                                                                                                                                          | $K_f(\text{M}^{-1})$                                                                                                                                                                   | Ref<br>no.      |
|-------|------------------------------------------------------------------------------------|---------------------------------------------------|----------------------------------------------------------------------------------------------------------------------------------------------|----------------------------------------------------------------------------------------------------------------------------------------------------------------------------------------|-----------------|
| 11    | CH <sub>3</sub> CN: Tris-<br>buffer(1:1, v/v)                                      | 520(586)                                          | 1.10 × 10 <sup>-5</sup> M(Fe <sup>3+</sup> )<br>3.20 × 10 <sup>-7</sup> M(Al <sup>3+</sup> )<br>2.55 × 10 <sup>-5</sup> M(Cr <sup>3+</sup> ) | 6.13 × 10 <sup>4</sup> M <sup>-1</sup> (Fe <sup>3+</sup> )<br>3.14 × 10 <sup>3</sup> M <sup>-1</sup> (Al <sup>3+</sup> )<br>2.26 × 10 <sup>3</sup> M <sup>-1</sup> (Cr <sup>3+</sup> ) | 11              |
| 12    | methanol/H <sub>2</sub> O (1:1,<br>v/v,)                                           | 510(555)                                          | 0.29mM (Fe <sup>3+</sup> )<br>0.34mM (Al <sup>3+</sup> )<br>0.31 mM (Cr <sup>3+</sup> )                                                      | 6.7 × 10 <sup>4</sup> M <sup>-1</sup> (Fe <sup>3+</sup> )<br>8.2 × 10 <sup>4</sup> M <sup>-1</sup> (Al <sup>3+</sup> )<br>6.0 × 10 <sup>4</sup> M <sup>-1</sup> (Cr <sup>3+</sup> )    | 12              |
| 13    | H <sub>2</sub> O/CH <sub>3</sub> CN (4:1,<br>v/v)                                  | 502(558)                                          | 1.28 μM (Fe <sup>3+</sup> )<br>1.34 μM (Al <sup>3+</sup> )<br>2.28 μM (Cr <sup>3+</sup> )                                                    | 9.4 × 10 <sup>3</sup> M <sup>-1</sup> (Fe <sup>3+</sup> )<br>1.34 × 10 <sup>4</sup> M <sup>-1</sup> (Al <sup>3+</sup> )<br>8.37 × 10 <sup>3</sup> M <sup>-1</sup> (Cr <sup>3+</sup> )  | 13              |
| 14    | CH <sub>3</sub> CN–H <sub>2</sub> O (3:2,<br>v/v)                                  | 520(582)                                          | 3.2 μM (Fe <sup>3+</sup> )<br>4.8 μM (Al <sup>3+</sup> )<br>0.93 μM (Cr <sup>3+</sup> )                                                      | Not determined                                                                                                                                                                         | 14              |
| 15    | Methanol:water<br>(9:1, v/v)                                                       | 500(550)                                          | 14.0 nM (Fe <sup>3+</sup> )<br>15.80 μM (Al <sup>3+</sup> )<br>0.93 μM (Cr <sup>3+</sup> )                                                   | 8.74 × 10 <sup>4</sup> (Fe <sup>3+</sup> )<br>6.24 × 10 <sup>4</sup> (Cr <sup>3+</sup> )<br>1.47 × 10 <sup>5</sup> (Al <sup>3+</sup> )                                                 | 15              |
| 16    | H <sub>2</sub> O/CH <sub>3</sub> CN (7:3,<br>v/v, pH<br>7.2, 20 mM<br>HEPES buffer | 502(558)                                          | 2.57μM ( Fe <sup>3+</sup> )<br>0.78 μM(Al <sup>3+</sup> )<br>0.47 μM(Cr <sup>3+</sup> )                                                      | 5.15×10 <sup>4</sup> M <sup>-1</sup> (Fe <sup>3+</sup> )<br>3.17 × 10 <sup>4</sup> M <sup>-1</sup> (Al <sup>3+</sup> )<br>4.42 × 10 <sup>5</sup> M <sup>-1</sup> (Cr <sup>3+</sup> )   | In this<br>work |

**Table S3.** Determination of Fe<sup>3+</sup> concentrations in real water samples.

| Place                      | Fe <sup>3+</sup> added(μM) | Fe <sup>3+</sup> found(μM) |
|----------------------------|----------------------------|----------------------------|
| Hooghly River water        | 32                         | 32.08                      |
| Baruipur canal water       | 40                         | 40.12                      |
| Sonarpur (tube well water) | 56                         | 56.37                      |
| Damdham (tube well water)  | 80                         | 80.59                      |

## References

1. A. Barba-Bon, A.M.Costero, S.Gil, M. Parra, J. Soto, R. Martínez-Máñez and F. Sancenón, *Chem. Commun.*, 2012, **48**, 3000.
2. S. Goswami, K. Aich, A. K. Das, A. Manna and S. Das, *RSC Advances*, 2013, **3**, 2412.
3. S. Goswami, K. Aich, S. Das, A. K. Das, D. Sarkar, S. Panja, T. K.Mondal and S. Mukhopadhyay, *Chem. Commun.*, 2013, **49**, 10739.

4. M. Venkateswarulu, T. Mukherjee, S. Mukherjee and R. R.Koner, *Dalton Trans.*, 2014, **43**, 5269.
5. J. Wang, Y. Li, N. G. Patel, G. Zhang, D. Zhou and Y. Pang, *Chem. Commun.*, 2014, **50**, 12258.
6. S. Paul, A. Manna and S. Goswami, *Dalton Trans.*, 2015, **44**, 11805.
7. P. N. Borase, P. B. Thale, S. K. Sahoo and G.S. Shankarling, *Sensors and Actuators B*, 2015, **215**, 451.
8. S. Dey, S. Sarkar, D. Maity and P. Roy, *Sensors and Actuators B*, 2017, **246**, 518.
9. S. Samanta, S. Goswami, A. Ramesh and G. Das, *Sensors and Actuators B*, 2014, **194**, 120.
10. T. Simon, M. Shellaiah, V. Srinivasadesikan, C.-C. Lin, F. -H. Ko, K. Wen Sun and M.-C. Lin, *Sensors and Actuators B*, 2016, **23**, 18.
11. X. Wan, T. Liu, H. Liu, L. Gu, Y. Yao, *RSC Adv.*, 2014, **4**, 29479
12. R. Alam, R. Bhowmick, A.S.M. Islam, A. Katarkar, K. Chaudhuri and M. Ali, *New J. Chem.*, 2017, **41**, 8359.
13. D. Das, R. Alam, A. Katarkar and M. Ali *Photochem. Photobiol. Sci.*, 2019, **18**, 242.
14. H.X. Yu, J. Zhi, Z.F. Chang, T. Shen, W.L. Ding, X. Zhang and J.L. Wang, *Mater. Chem. Front.*, 2019, **3**, 151
15. A. Roy, S. Das, S. Sacher, S. K. Mandal and P. Roy, *Dalton Trans.*, 2019, **48**, 17594.
